# Genes involved in the convergent evolution of asexuality in stick insects

Darren J. Parker<sup>1,2,\*</sup>, Jens Bast<sup>1</sup>, Kirsten Jalvingh<sup>1</sup>, Zoé Dumas<sup>1</sup>, Marc Robinson-Rechavi<sup>1,2</sup>, and Tanja Schwander<sup>1</sup>

1. Department of Ecology and Evolution, University of Lausanne, Lausanne, Switzerland

2. Swiss Institute of Bioinformatics, Lausanne, Switzerland

\* Corresponding author: [DarrenJames.Parker@unil.ch](mailto:DarrenJames.Parker@unil.ch)

14 **Abstract**

15

16 The ability to reproduce is one of the most fundamental traits that distinguishes living organisms  
17 from inorganic matter, yet, organisms use a panoply of strategies for reproduction. The evolution  
18 of these strategies, especially sexual and asexual reproduction, has been the focus of intensive  
19 study. By contrast, the molecular underpinnings of sexual and asexual reproduction remain  
20 relatively unknown. We investigated convergent gene expression changes and patterns of  
21 molecular evolution across five independent transitions to asexuality in stick insects. We  
22 compared gene expression of asexual females to those of females from close sexual relatives in  
23 whole-bodies and two tissues: the reproductive tract and legs. We identified a striking amount of  
24 convergent gene expression change, ranging from 5 to 8% of genes examined. Convergent  
25 changes were also tissue-specific, with most convergent genes changing in only one tissue type.  
26 Functional enrichment tests found that genes showing convergent changes in the reproductive  
27 tract were associated with meiotic spindle formation and centrosome organization. These genes  
28 are particularly interesting as they can influence the production of unreduced eggs, a key barrier  
29 to asexual reproduction. Changes in legs and whole-bodies were likely involved in female sexual  
30 trait decay, with enrichment in terms such as sperm-storage and pigmentation. By identifying  
31 changes occurring across multiple independent transitions to asexuality, our results provide a rare  
32 insight into the molecular basis of asexual phenotypes and suggest that the evolutionary path to  
33 asexuality is highly constrained, requiring repeated changes to the same key genes.

34

35

36 **Keywords:** convergent evolution, parthenogenesis, *Timema*

## 37 Introduction

38  
39 Sexual reproduction is extremely costly. Sex is less efficient than asexuality for transmitting genes  
40 to future generations [1] and in order to outcross, an individual has to find a partner, forgo foraging,  
41 and risk contracting sexually transmitted diseases and predation while mating [2,3]. Yet, the  
42 overwhelming number of sexual, as compared to asexual, animal and plant species [4,5] indicates  
43 that sexual reproduction is highly advantageous. Identifying potential advantages conferred by  
44 sex has motivated decades of research and a rich body of work on the evolution and maintenance  
45 of sexual and asexual reproduction has been produced (reviewed in [2,6–9]). By contrast, little is  
46 known about the molecular underpinnings of transitions between reproductive systems [10]. Yet  
47 these molecular underpinnings have the potential to provide insights into the processes involved  
48 in the evolution of asexuality, and to help understand how sex is maintained. For example, sex is  
49 more easily maintained if asexuality evolves gradually in a sexual population than if it emerges  
50 suddenly via major effect mutations [11–13].

51  
52 Some insight into the genetic basis of asexuality has been gained from studies of individual  
53 asexual lineages [14–17], but a broad comparative framework for exploring common principles of  
54 the molecular basis of asexuality is lacking. For example, a major unresolved question is whether  
55 independent transitions to asexuality involve similar or different molecular changes. To address  
56 these shortcomings, we explored the molecular underpinnings of asexuality in stick insects of the  
57 genus *Timema*, a genus of wingless, herbivorous insects native to the West coast of North  
58 America and the mountains of the Desert Southwest. This group is uniquely suited for  
59 comparative studies of asexuality, as asexuality has evolved at least seven times independently  
60 [18] (Fig. 1), allowing us to study convergence across replicate transitions from sexual to asexual  
61 reproduction. Furthermore, close sexual relatives are at hand for each asexual lineage for  
62 comparison. All asexual *Timema* species reproduce via obligate parthenogenesis [19], meaning  
63 that they evolved the ability to produce unreduced eggs which develop without fertilization by  
64 sperm. Additional phenotypic changes evolved convergently as adaptations to asexuality,  
65 including a reduced sperm storage organ, and reduced sexual pheromone production [20]. Thus,  
66 asexual *Timema* females are less attractive to sexual males [20], which use both airborne and  
67 contact signals to identify suitable mates [21–23], and even when copulations between sexual  
68 males and asexual females are forced under laboratory conditions, eggs are not fertilized [20].

69

70 To capture molecular changes associated with the evolution of asexuality we performed whole-  
71 body and tissue-specific transcriptome sequencing (RNA-seq) on females from five sexual and  
72 five asexual *Timema* species (Fig. 1). We chose two different tissues, the reproductive tract and  
73 legs, to identify the molecular mechanisms underlying the production of asexual offspring  
74 (reproductive tract), and adaptations to a celibate life (e.g. reduction of various different sexual  
75 traits in the reproductive tract and legs). Note that the reproductive tract and leg samples actually  
76 represent a collection of tissues, but we refer to them as tissues throughout for brevity. Whole-  
77 body samples were included as they allow us to identify important changes that may be missing  
78 in the tissue-specific transcriptomes. Using this approach, we identified convergent expression  
79 changes which were likely driven by selection. We also observed changes specific to each sexual-  
80 asexual species-pair which typically showed concerted changes across tissues, consistent with  
81 being a product of drift [24,25]. Finally, to complement our expression analyses, we examined  
82 patterns of molecular evolution in genes showing convergent expression changes following a  
83 transition to asexuality.

## 84 **Results**

85

### 86 ***Transcriptomes and orthology***

87

88 Reference transcriptome assemblies for each species were generated previously [26]. Bast et al.  
89 [26] also identified 3010 one-to-one orthologs, which were used as our transcriptome reference.  
90 For each tissue, orthologs with low expression (counts per million less than 0.5 in two or more  
91 libraries per species) were filtered prior to expression analyses. Thus, the final number of  
92 orthologs kept for analyses of whole-body, reproductive tract, and leg samples was 2984, 2753,  
93 and 2740, respectively.

94

### 95 ***Convergent gene expression changes***

96

97 We identified convergent gene expression changes between sexual and asexual species by  
98 modelling gene expression as a function of species-pair (see Fig. 1), reproductive mode (sexual  
99 or asexual), and their interaction in edgeR [27]. In such a model, convergence is indicated by an  
100 overall effect of reproductive mode (FDR < 0.05), but no interaction (FDR > 0.05) (Supplemental  
101 Table 1). Approximately four times as many genes changed convergently in the reproductive tract  
102 (7%; 203/2754) and legs (8%; 206/2737) as compared to the whole-body (2%; 57/2985), perhaps  
103 reflecting the relative difficulty in identifying expression changes in complex tissue assemblies  
104 such as whole-bodies [28]. The amount of convergence we observe is considerable and  
105 approximately double what we would expect by chance, for all tissues (whole-body:  $p = 0.0128$ ,  
106 reproductive tract:  $p < 0.0001$ , legs:  $p < 0.0001$ , Supplemental Fig. 1). The amount of change  
107 between sexual and asexual females was relatively small for convergent genes, with a mean fold  
108 change of approximately 1.4 (absolute  $\log_2$  expression change for whole-body = 0.55,  
109 reproductive tract = 0.68, and legs = 0.46) (Fig. 2).

110

111 As expected for selection-driven gene expression changes [24,25], convergent changes between  
112 sexual and asexual species were highly tissue-specific. Only 22 of the convergent genes in the  
113 reproductive tract (203) and legs (206) overlapped between the two tissues, a value not  
114 significantly greater than expected by chance (Table 1). There was also little overlap between  
115 convergent genes in the two tissues and whole-bodies (Table 1, Supplemental Fig. 2). This  
116 supports the interpretation that the convergent changes in expression are driven by selection  
117 rather than by drift, as drift is more likely cause similar changes across multiple tissues. This

118 interpretation of selection also predicts that convergent genes will be involved in divergent  
119 functions in each tissue which, as we show below, is indeed the case.

120

### 121 ***Functional processes of convergently expressed genes***

122

123 To detect convergence at the process level, we performed gene set enrichment analyses (GSEA).  
124 Briefly, we scored Gene Ontology (GO) terms according to the rank of convergent expression  
125 change of genes annotated to the terms; GO terms were then called significant if they had a better  
126 average rank than expected by chance (see Methods). More than 100 GO terms are enriched in  
127 each tissue studied (FDR < 0.05), providing strong support for convergence of biological  
128 processes between asexual species (Supplementary Tables 2-4). This signal is not dependent  
129 on any threshold at the gene level, and thus provides information on convergence at the process  
130 level due to small but consistent contributions from many genes. Consistent with the gene  
131 expression results, enriched GO terms were generally tissue specific; we found no significant  
132 overlap between GO-terms enriched in the legs and reproductive tract (11 shared terms, FDR =  
133 0.123), between the legs and whole-body (4 shared terms, FDR = 0.799), or between whole-body  
134 and reproductive tract samples (10 shared terms, FDR = 0.064).

135

136 To reduce the number of enriched GO terms to examine we semantically clustered enriched GO  
137 terms using ReviGO [29] (Supplemental Tables 5-7). The annotations of convergent changes in  
138 the reproductive tract reflect the convergent evolution of parthenogenesis in asexual *Timema*, as  
139 they were linked to meiosis (meiotic spindle organization, meiosis II, centrosome duplication,  
140 meiosis I cytokinesis, meiosis II cytokinesis), and reproduction (growth of a germarium-derived  
141 egg chamber, sperm individualization, gamete generation). However, convergent changes were  
142 also linked to neuron development (neurogenesis, neuron development, neuron recognition), as  
143 well as several GO terms involved in development and metabolic processes for which the link to  
144 asexuality is less clear. In legs we identified GO terms involved in immune defence (response to  
145 fungus, regulation of production of molecular mediator of immune response, regulation of  
146 antimicrobial peptide production, regulation of humoral immune response), which may be  
147 because asexual females are no longer susceptible to the costs associated with diseases  
148 transmitted from sexual interactions, which can be considerable [30]. Convergent changes were  
149 also linked to sex determination (primary sex determination; soma, primary response to X:A ratio),  
150 which may control changes in the expression of sexual traits, and several metabolic processes.  
151 In whole-body samples we find some reproduction associated terms (courtship behavior, male

152 mating behavior, male courtship behavior, sperm storage, regulation of ovulation) as in the  
153 reproductive tract, and behavioral, and immune related terms (immune response-regulating cell  
154 surface receptor signaling pathway) as in legs, but also some unique terms relating to the cuticle  
155 (ecdysone, pupal chitin-based cuticle development).

156

### 157 ***Convergently expressed genes in whole-bodies show evidence for sexual trait decay***

158

159 Several of the enriched functional processes described above are suggestive of sexual trait  
160 decay. Under this scenario we expect a reduction of purifying selection on genes underlying  
161 sexually dimorphic traits in asexual species, indicated by an increased accumulation of non-  
162 synonymous changes.

163

164 The power to detect differences in pN/pS or dN/dS between gene sets in asexuals is low, as  
165 genes are inherited as a single linkage group. Nevertheless, we found that genes showing  
166 convergent changes in expression in whole-bodies showed elevated pN/pS and dN/dS when  
167 compared to the genomic background (permuted t-test p-value for: pN/pS < 0.0001, dN/dS =  
168 0.0084, Fig. 3, Supplemental Figs. 3 and 4), consistent with the idea of sexual trait decay. Sexual  
169 trait decay is further supported by the examination of functional annotations for such genes which  
170 include one gene (OG-2854) that is produced primarily in male accessory glands in *Drosophila*,  
171 and at least three other genes (OG-2197, OG-663, OG-1014) that are involved in pigment  
172 synthesis pathways (pigmentation is sexually dimorphic in *Timema* see Fig. 1B). In contrast,  
173 genes showing convergent changes in expression in the reproductive tract and legs did not show  
174 elevated pN/pS or dN/dS (Fig. 3, Supplemental Figs. 3 and 4), suggesting that convergent  
175 expression changes in these tissues do not coincide with reduced purifying selection acting on  
176 their sequences.

177

178 We conducted several additional analyses to check the robustness of our results and corroborate  
179 our interpretations. Firstly, we examined in detail the functions of candidate gene sets for which  
180 there was very strong evidence for convergent changes, and secondly, we used cross-species  
181 mapping to examine expression changes occurring across the whole transcriptome, rather than  
182 only in the subset of genes we identified as single copy orthologs between the 10 species. Both  
183 approaches support the results from our original analyses and are described below.

184

185

186 ***Strongly convergent candidate genes and their function***

187

188 Although all the convergent genes we identified showed an overall shift in expression across the  
189 five species-pairs, often expression change in one or two of the pairs was small (<1.2 fold  
190 change). We defined top candidate genes as convergent genes for which the absolute log<sub>2</sub> fold  
191 change in expression was more than 0.25 (~1.2 fold change) for all species-pairs. Most of these  
192 top genes showed convergent shifts in the reproductive tract (36 genes, relative to 4 and 15 genes  
193 for whole-body and legs, respectively) (Figure 4, Supplemental Table 1). The functions of these  
194 candidate genes largely reflected the functional processes identified for the full set of convergently  
195 expressed genes, and highlight a number of key genes potentially involved in producing asexual  
196 phenotypes.

197

198 For the reproductive tract four genes are involved in meiotic spindle formation and centrosome  
199 organization (OG-513, OG-1448, OG-1488, OG-314). In particular we find two genes (OG-1448,  
200 OG-1488) belonging to a family of Elovl proteins that mediate elongation of very-long-chain fatty  
201 acids, including an ortholog to *D. melanogaster* gene *bond*, which effects spindle formation and  
202 has been shown to be important for meiotic, but not mitotic, cytokinesis [31]. In particular, *D.*  
203 *melanogaster* males defective for *bond* commonly display two to four nuclei in spermatids causing  
204 sterility. Female *bond* mutants are also infertile [31], although the mechanism is unknown. The  
205 other two genes (OG-513, OG-314) have roles in centrosome function, including an ortholog to  
206 *poc1* which is involved in centrosome formation [32]. Six genes (OG-758, OG-2002, OG-1478,  
207 OG-1993, OG-2686, OG-148) were annotated with reproduction associated terms which may be  
208 responsible for the convergent reproductive changes we observe between asexual and sexual  
209 females. Interestingly, one gene, OG-511, is an ortholog to glucose dehydrogenase which is  
210 important for sperm storage in female *D. melanogaster* [33]. Finally, we find that 11 genes (OG-  
211 1195, OG-1478, OG-1841, OG-2197, OG-2808, OG-366, OG-445, OG-511, OG-705, OG-712,  
212 OG-758, OG-810) have annotations to the nervous system. The majority of these appear to be  
213 sensory in nature, and in particular seven are annotated with the GO term “sensory perception of  
214 pain”. Changes in these genes may represent changes associated with female receptivity and  
215 post-mating behaviour in asexual females, which are target of substances in the male ejaculate  
216 [34–36].

217

218 For leg samples three genes (OG-1651, OG-2048 and OG-1081) are involved in immune defence.  
219 In particular orthologs of both genes (*Trx-2* and *MP1*) are involved in the activation of melanisation



220 in response to fungal and bacterial infection in *D. melanogaster* [37,38]. Three genes are involved  
221 in cuticle development (OG-2221, OG-2738, and OG-2995). Orthologs of two other genes (OG-  
222 1371 and OG-2031) are involved in male specific behaviours (male courtship behavior and inter-  
223 male aggressive behavior) in *D. melanogaster* (*CaMKII* and *Fkbp14*) [39,40]. Since these genes  
224 are also expressed in females, changes to their expression may have resulted from the release  
225 of intralocus sexual conflict.

226  
227 Whole-body samples had only four strong candidate genes, and all either have no annotation or  
228 have only broad GO-terms annotated. One potentially interesting gene, OG-2188, has an ortholog  
229 (*CG12237*) that has been associated with female sterility in *D. melanogaster* [41]. Finally, the  
230 remaining candidate genes across all tissues were either unannotated (12 genes) or only have  
231 very broad GO-terms annotated (10 genes).

232

### 233 ***Cross-species mapping***

234

235 Using only the 3010 genes with 1-to-1 orthologs across all species could impact our ability to  
236 detect convergent changes since we only use a relatively small fraction of the total number of  
237 transcripts in each assembly (23435 to 37847; Supplemental Table 8). To investigate more genes,  
238 we mapped reads from all samples to genes from each species which had a reciprocal-best-blast-  
239 hit between species-pairs (which includes the 1-to-1 orthologs analysed above). This approach  
240 generated 10 different datasets (one for each species assembly), with between 15500 and 17583  
241 genes. After filtering out genes with low expression (using cpm, see Methods) in each dataset,  
242 this approach allowed us to examine between 2.43-3.12 (dependent on species and tissue) times  
243 more genes than using the 1-to-1 orthologs (Supplemental Table 8). Results from this approach  
244 qualitatively confirmed the results found using only the 1-to-1 orthologs: the percentage of genes  
245 showing a convergent expression ranged from 4-5% for whole-body samples and 6-8% for the  
246 reproductive tract and leg samples, dependent on which of the species transcriptome was used  
247 (Supplemental Table 8), and GSEA produced similar enriched GO terms (Supplemental Tables  
248 9-11)

249

### 250 ***Species-pair specific changes***

251

252 The approach taken above allowed us to identify genes which showed convergent changes in  
253 expression across independent transitions to asexuality. This approach will not identify expression

254 changes confined to a single or few species-pairs. Such changes are clearly not convergent at  
255 the gene expression level, however, these changes could be convergent at the functional process  
256 level, whereby species-pair specific changes in gene expression are involved in common  
257 functional processes between species-pairs. To test this, we compared each asexual species to  
258 its closest sexual relative and called differentially expressed (DE) genes from each pairwise  
259 comparison.

260  
261 The number of significantly DE genes between each pair varied greatly depending on species-  
262 pair and tissue (59 to 626, Supplementary Fig. 5), with a generally greater number of genes DE  
263 in leg tissue likely due to the smaller variation between replicates (common biological coefficient  
264 of variation was lowest for legs: whole-body = 0.314, reproductive tract = 0.340, legs = 0.238).  
265 There were no genes that showed overlap between all sexual-aseexual species-pairs in any tissue  
266 (Fig. 5A). Examination of overlaps between pairs of sexual-aseexual species-pairs found some  
267 overlapping genes, but these were close to the expectation by chance (Fig. 5B, for all levels see  
268 Supplemental Table 12). The majority of the DE genes also showed a significant interaction  
269 between species-pair and reproductive mode in the model used to identify convergently changing  
270 genes (whole-body = 69%, reproductive tract 66%, and legs = 81%), corroborating the finding  
271 that the vast majority of the DE genes are species-pair specific. Note the species-pair by  
272 reproductive mode interactions do not appear to be generated by one specific species-pair as  
273 generally genes DE between one species-pair were not DE between the other 4 species-pairs.

274  
275 The DE genes of the different species pairs are not involved in convergent functional processes.  
276 Species-pair-specific genes were enriched for a number of GO terms, however no GO terms were  
277 found to overlap between all pairs in any tissue (Supplemental Fig. 6). Examination of overlaps  
278 between pairs of sexual-aseexual species-pairs found some overlapping GO terms, but these were  
279 close to the expectation by chance (Supplemental Table 13). This pattern remained even when a  
280 more liberal approach, whereby related GO-terms were considered as a unit, was applied  
281 (Supplemental Fig. 7A). This overall lack of overlap suggests that species-pair-specific genes are  
282 not involved in producing convergent phenotypes but are instead the product of either lineage-  
283 specific selection or drift. These two processes are difficult to disentangle, but our results are  
284 more consistent with drift rather than lineage-specific selection. Indeed, species-pair specific  
285 genes showed similar changes in gene expression across tissues, in contrast to the mainly tissue-  
286 specific changes uncovered for convergently changing genes. The overlap of species-pair specific  
287 genes between tissues was significantly greater than expected by chance (Table 1).

288 Finally, these results were reproduced when examining a much larger set of genes (genes with  
289 reciprocal-best-blast-hits between species-pairs, see above) as both genes DE between each  
290 species-pair, and their enriched GO terms, showed little overlap (Supplemental Figs 8 and 9, and  
291 Supplemental Tables 14 and 15).

292

## 293 **Discussion**

294

295 Asexuality has convergently evolved numerous times across the tree of life, and a large body of  
296 research focuses on the reasons why sexual reproduction persists in the face of competition from  
297 asexual lineages. By contrast, the molecular underpinnings of transitions from sexual to asexual  
298 reproduction remain largely unknown [10]. In this study we examined gene expression changes  
299 associated with transitions to asexuality across five independently evolved asexual lineages, in  
300 whole-bodies, reproductive tracts and legs. The changes we observe provide, for the first time,  
301 insights into the convergent evolution of asexuality at the molecular level.

302

303 We found evidence for convergent changes in gene expression in all three tissues. Three lines of  
304 evidence suggest that these changes are a product of selection. Firstly, parallel changes across  
305 multiple independent transitions represent strong evidence of selection and thus are unlikely to  
306 be due to drift [42,43]. Secondly, convergent changes were primarily tissue-specific. This finding  
307 is consistent with selection, because expression changes due to drift are likely to be correlated  
308 across tissues [24,25]. Indeed, the different functional roles of reproductive tracts and legs make  
309 it unlikely that selection would drive changes in the same genes in all tissues. Finally, the  
310 functional processes of convergently expressed genes mirror the changes observed at the  
311 phenotypic level, supporting the interpretation that these genes contribute to the convergent  
312 phenotypic changes observed between sexual and asexual females.

313

314 The overall amount of convergence is striking, particularly in the reproductive tract and legs with  
315 approximately 8% of genes showing a convergent shift in expression. Such a large amount of  
316 convergence suggests that the path from sexual reproduction to asexuality is strongly  
317 constrained, requiring changes to the same genes and biological processes in order to produce  
318 asexual phenotypes.

319

### 320 ***Convergent changes in gene expression reveal the mechanisms underlying the production*** 321 ***of asexual offspring***

322

323 Asexuality is a complex adaptation that includes two major components: the ability to produce  
324 viable asexual offspring, and secondary adaptive changes that would not have been selected for  
325 in sexual species (e.g. the reduction of costly sexual traits). A key change necessary for the  
326 production of asexual offspring is the ability to produce unreduced eggs [44]. Convergently

327 expressed genes in the reproductive tract were enriched for changes in meiosis, and in particular  
328 meiotic spindles, which are key for the proper division of cells during meiosis. Mutations in meiotic  
329 spindles have been shown to result in unreduced meiotic products in *D. melanogaster*, and  
330 specifically in two genes (*bond* [31] and *pelo* [45]) which show convergent changes in expression  
331 in asexual *Timema*. As such we suggest that these changes may underlie the non-reduction of  
332 eggs in asexual *Timema*. An alternative hypothesis is that since *Timema* reproduce  
333 parthenogenetically (and thus likely no longer recombine) changes in meiotic genes represent  
334 trait decay. Although possible, previous work has shown that, in fact, meiotic genes are not only  
335 retained in asexual lineages without damaging mutations, but often appear to be subject to  
336 selection for changes in expression, via duplication or differential upregulation of promoters [46–  
337 49]. Taken together with our results, we suggest that modifications to meiotic genes, specifically  
338 those that that disrupt meiotic cell division, are key in overcoming a major barrier to the evolution  
339 of asexuality: the production of unreduced eggs.

340  
341 The production of unreduced eggs is not the only barrier to producing offspring asexually. In most  
342 species, sperm transfer essential components for the formation of a functioning centrosome  
343 [50,51]. This paternal contribution represents a second key barrier in the evolution of  
344 parthenogenesis in many systems [44]. However, in phasmids the centrosome is assembled  
345 without any contribution from sperm in both sexual and asexual species [52]. This may act as pre-  
346 adaptation for asexuality in stick insects and account, in part, for the large number of asexual stick  
347 insects.

348  
349 A final barrier to asexual offspring production in many systems is egg activation. In many species  
350 mature oocytes are arrested at a specific stage (e.g. at metaphase II in mammals, and metaphase  
351 I in most insects), and must be activated by sperm to re-enter the cell-cycle [44,53,54]. In insects  
352 however, egg activation does not require sperm as activation is induced by the transit through the  
353 reproductive tract [55]. Despite this, ovulation and egg-laying rates are strongly tied to mating  
354 [56,57] meaning this signal must be modified in order for asexual insects to have normal levels of  
355 fecundity. In insects, the signal to a female that she has successfully mated is likely detected by  
356 sensory neurons in her reproductive tract [58]. Consistent with this, we find changes in gene  
357 expression linked to sensory neurons in the reproductive tract of asexual females, which may act  
358 to cue high levels of ovulation without mating. Alternatively, these changes may represent the  
359 decay of these neurons since they are no longer needed to detect mating events, or these  
360 changes may result from cessation of sexual conflict. Sensory neurons in the reproductive tract

361 are known targets of substances in the male ejaculate [34–36] to induce the release of eggs and  
362 to reduce female receptivity [57]. This manipulation is countered by female resistance adaptations  
363 which are likely costly, meaning that, following a transition to asexuality, there will be selection  
364 against them.

365

366 ***Convergent changes in gene expression show evidence for the decay of female sexual***  
367 ***traits***

368

369 Sexual traits in asexual females are often observed to be reduced or lost [59]. For instance, in  
370 insects, females typically produce pheromones as a sexual cue to attract males [60], and this cue  
371 has been repeatedly reduced or lost in several asexual species (see [59]), including *Timema* [20].  
372 Such trait decay can be the result of either reduced purifying selection acting on traits that are  
373 now selectively neutral, or selection to reduce the cost of producing sexual traits. In asexual  
374 *Timema* reproductive decay has been primarily attributed to selection rather than reduced  
375 purifying selection, as reproductive trait decay in very young asexual lineages is as extensive as  
376 in old ones [20].

377

378 Convergent gene expression changes underlying the decay of reproductive traits are mostly  
379 observed in *Timema* whole-bodies. In particular, we find enrichment of terms associated with  
380 sperm storage and sexual behaviour. Changes in the legs were less obviously associated with  
381 reproductive trait decay, however we do find changes in genes involved in cuticle development,  
382 pigment biosynthesis, sensory perception of touch, and changes in sexual behavior. These  
383 changes could represent the reproductive decay of both sexual cues (e.g. cuticular hydrocarbons  
384 and pigmentation which are both important for mate choice in insects (reviewed in [61]), and their  
385 detection (via sensory receptors on the leg (reviewed in [62])). In addition, we also find changes in  
386 genes associated with sex determination in the soma, including *sex-lethal*, a master-feminizing  
387 switch in *Drosophila* [63] which may have a major influence the development of many sexual traits  
388 in the legs.

389

390 Although we focus on expression, it is possible that the decay of sexual traits is also evident at  
391 the sequence level. By examining the coding regions of genes, we found evidence for reduced  
392 purifying selection acting on the sequence of genes showing convergent expression changes in  
393 the whole-body. This suggests, that in some cases, the reduction of sexual traits may be

394 accomplished by both expression and sequence changes, which potentially act interactively to  
395 produce a phenotypic change.

396

397 Unexpectedly, we also find changes to immune function in the legs and whole-body, the majority  
398 of which show down-regulation in asexual females. A possible explanation for this is that asexual  
399 females are likely to face a reduced number of immune challenges compared to sexual females  
400 due to the elimination of sexually transmitted diseases, the costs of which can be considerable,  
401 even shaping the evolution of many aspects of an organism's life history, such as mate choice,  
402 mating rate, and sexual signal investment [30,64]. As such we suggest asexual females may be  
403 reducing the allocation of resources to immune function due to the absence sexually transmitted  
404 diseases. This effect may be particularly strong in solitary species such as *Timema*, where the  
405 majority of socially transmitted diseases come from sexual interactions.

406

#### 407 ***Species-pair specific changes***

408

409 In addition to convergent changes, we also identified many species-pair specific gene expression  
410 changes. In contrast to convergent genes, species-pair specific genes showed common shifts in  
411 expression across tissues, and inconsistent associations with functional processes between  
412 species-pairs, that were largely unrelated to asexual phenotypes. Taken together, these results  
413 suggest that the majority of changes we observe from a single sex-asex species-pair comparison  
414 are due to drift rather than selection. Our findings thus highlight the problem of drawing inferences  
415 on the causes or consequences of asexuality from the examination of only a single transition to  
416 asexuality, whereas examining several transitions allows us to disentangle adaptive changes and  
417 those due to drift.

418

419 Overall, we find evidence for a striking number of convergent changes across five transitions to  
420 asexuality. The amount of molecular convergence to expect, however, is dependent on several  
421 factors including the complexity of the phenotype, and the size of the mutational target [65]. For  
422 instance, here we find that a key change required for asexual reproduction, the production of  
423 unreduced eggs, likely requires changes to meiotic spindle regulation. The pathways that govern  
424 meiotic spindle regulation are relatively small in number [66], meaning that only a small minority  
425 of genes are likely able to confer the relevant changes, making the chance of convergence for  
426 this trait relatively high. In contrast, the observed reduction of sexual traits could be produced by  
427 changes to numerous genes and pathways (i.e. there is a large mutational target) making

428 convergent changes for these traits less likely. Despite this, our and previous studies examining  
429 trait loss have also demonstrated a high amount of convergence [67–70], implying that certain  
430 genes have a disproportionate role in not only the convergent evolution of novel phenotypes, but  
431 also in their convergent loss [65,71].



## 432 **Methods**

433

### 434 ***Samples***

435

436 Females for whole-body samples were collected from the field as juveniles in spring 2013. All  
437 individuals were then raised in common garden conditions (23°C, 12h:12h, 60% humidity, fed with  
438 *Ceanothus* cuttings) until eight days following their final molt. Prior to RNA extraction, individuals  
439 were fed with artificial medium for two days to avoid RNA contamination with gut content and then  
440 frozen at -80°C. Individuals used for tissue-specific samples were collected in spring 2014 as  
441 juveniles and raised in the same common-garden conditions as whole-body samples. For leg  
442 samples three legs were used from each individual (one foreleg, one midleg, and one hindleg).  
443 Reproductive tracts were dissected to consist of ovaries, oviducts and spermatheca. Note the  
444 same individuals were used for leg and reproductive tract samples. Collection locations for all  
445 samples are given in Supplemental Table 16.

446

### 447 ***RNA extraction and sequencing***

448

449 The three biological replicates per species and tissue consisted of 1-9 individuals per replicate,  
450 which were combined prior to RNA extraction (207 individuals in 90 replicates in total; see  
451 Supplemental Table 16). RNA extraction was performed by freezing individuals in liquid nitrogen  
452 followed by addition of Trizol (Life Technologies) before being homogenized using mechanical  
453 beads (Sigmund Lindner). Chloroform and ethanol were then added to the samples and the  
454 aqueous layer transferred to RNeasy MinElute Columns (Qiagen). RNA extraction was then  
455 completed using an RNeasy Mini Kit following the manufacturer's instructions. RNA quantity and  
456 quality was measured using NanoDrop (Thermo Scientific) and Bioanalyzer (Agilent). Strand-  
457 specific library preparation and single-end sequencing (100 bp, HiSeq2000) were performed at  
458 the Lausanne Genomic Technologies Facility.

459

460 The 90 libraries produced a total of just over 3 billion single-end reads. Four whole-body and six  
461 tissue-specific libraries produced significantly more reads than the average for the other samples.  
462 To reduce any influence of this on downstream analyses, these libraries were sampled down to  
463 approximately the average number of reads for whole-body or tissue-specific libraries respectively  
464 using seqtk (<https://github.com/lh3/seqtk> Version: 1.2-r94).

465

## 466 ***Transcriptome references***

467

468 *De novo* reference transcriptome assemblies for each species were generated previously [26].  
469 For our analyses we used the 3010 one-to-one orthologs present in all 10 *Timema* species as  
470 identified by Bast et al. [26]. Identified ortholog sequences varied in length among different  
471 species. Since length variation might influence estimates of gene expression, we aligned  
472 orthologous sequences using PRANK (v.100802, default options) [72] and trimmed them using  
473 alignment\_trimmer.py [73] to remove overhanging gaps at the ends of the alignments. If the  
474 alignment contained a gap of greater than 3 bases then sequence preceding or following the  
475 alignment gap (whichever was shortest) was discarded. Three genes were discarded at this stage  
476 as the trimmed length of sequence was <300 bp. These trimmed sequences were then used as  
477 reference transcriptomes for read mapping. Note that genes with significant Blast hits to rRNA  
478 sequences were removed prior to mapping.

479

## 480 ***Read trimming and mapping***

481

482 Raw reads were trimmed before mapping. Firstly CutAdapt [74] was used to trim adapter  
483 sequences from the reads. Reads were then quality trimmed using Trimmomatic v 0.36 [75]: first  
484 clipping leading or trailing bases with a phred score of <10 from the read, before using a sliding  
485 window from the 5' end to clip the read if 4 consecutive bases had an average phred score of  
486 <20. Following quality trimming any reads <80 bp in length were discarded. Surviving reads from  
487 each library were then mapped separately to the reference transcriptome using Kallisto (v. 0.43.1)  
488 [76] with the following options -l 210 -s 25 --bias --rf-stranded for whole-body samples and -l 370  
489 -s 25 --bias --rf-stranded for tissue specific samples (the -l option was different for whole-body  
490 and tissue specific samples as the fragment length for these libraries was different).

491

## 492 ***Differential expression analysis***

493

494 Expression analyses were performed using the Bioconductor package EdgeR (v. 3.18.1) [27] in  
495 R (v. 3.4.1) [77]. Analyses were done separately for each tissue. Genes with counts per million  
496 less than 0.5 in 2 or more libraries per species were excluded from expression analyses.  
497 Normalization factors for each library were computed using the TMM method in EdgeR. To  
498 estimate dispersion we then fit a generalized linear model (GLM) with negative binomial  
499 distribution with the terms species-pair, reproductive mode and their interaction. We used a GLM

500 likelihood ratio test to determine significance of model terms for each gene by comparing  
501 appropriate model contrasts. P-values were corrected for multiple tests using Benjamini and  
502 Hochberg's algorithm [78], with statistical significance set to 5%. Using this approach, we  
503 classified genes as convergently differentially expressed when there was a significant effect of  
504 reproductive mode (FDR < 0.05) but no interaction effect of species-pair by reproductive mode  
505 (FDR > 0.05). Differentially expressed genes within each species-pair were identified using  
506 pairwise contrasts between each sexual and asexual pair.

507

508 To determine if genes DE within each species-pair and tissue show greater than expected number  
509 of overlapping genes we used the SuperExactTest package (v. 0.99.4) [79] in R which calculates  
510 the probability of multi-set intersections. When examining multiple intersections p-values were  
511 multiple test corrected using Benjamini and Hochberg's algorithm implemented in R.

512

513 To test if the observed number of convergent genes was significantly greater than expected by  
514 chance we performed a permutation test by whereby, for the read counts of each gene, we  
515 randomly switched the assignment of reproductive mode (sexual or asexual) within a species-  
516 pair. Note that all biological replicates from a particular group were always assigned to the same  
517 reproductive mode (i.e. In the event of a switch, all sexual replicates were assigned as asexual,  
518 and vice versa). This process was repeated to produce 10,000 permuted data sets, which were  
519 then ran through the gene expression pipeline described above to generate a distribution of the  
520 number of convergent genes we expect to find by chance.

521

522

### 523 **Go term analysis**

524

525 Genes were functionally annotated using Blast2GO (version 4.1.9) [80] as follows: sequences  
526 from each sexual species were compared with BlastX to either NCBI's nr-arthropod or *Drosophila*  
527 *melanogaster* (drosoph) databases, keeping the top 20 hits with e-values <1 x 10<sup>-3</sup>. Interproscan  
528 (default settings within Blast2GO) was then run for each sequence, and the results merged with  
529 the blast results to obtain GO terms. This produced two sets of functional annotations, one derived  
530 from all arthropods and one specifically from *Drosophila melanogaster*. The *D. melanogaster* GO  
531 term annotation generated around four times more annotations per sequence than NCBI's nr-  
532 arthropod database. We therefore conducted all subsequent analyses using the GO terms derived

533 from *D. melanogaster*, but note that results using the annotations from all arthropods were  
534 qualitatively the same (see Supplementary Fig. 7B).

535  
536 We conducted gene set enrichment analyses using the R package TopGO (v. 2.28.0) [81] using  
537 the elim algorithm to account for the GO topology. Gene set enrichment analyses identify enriched  
538 GO terms in a threshold-free way, by finding GO-terms that are overrepresented at the top of a  
539 ranked list of genes. For comparisons within a species-pair, genes were ranked by FDR; to identify  
540 enrichment of convergent genes, genes were ranked by FDR value for reproductive mode, with  
541 the FDR value for genes that showed a significant lineage by reproductive mode set to 1. GO  
542 terms were considered to be significantly enriched when  $p < 0.05$ . Enriched GO terms were then  
543 semantically clustered using ReviGO [29] to aid interpretation.

544  
545 The significance of overlapping GO terms was determined using SuperExactTest as described  
546 above. The hierarchical nature of GO terms generates a bias towards finding a significant amount  
547 of overlap, since enrichment terms are non-independent. It is however possible that the  
548 complexity of the GO term hierarchy could lead to convergent functional processes being  
549 overlooked. For instance if a GO term is enriched in one comparison, but its parent term is  
550 enriched in another comparison, then there would be no apparent overlap. To address this, we  
551 also looked at the amount of 'linked overlap' of GO terms, whereby significant GO terms were first  
552 clustered together based on parent or child terms.

553  
554 For the GO term enrichment analyses of convergently differential expressed genes we used only  
555 the annotation from *T. bartmani* as it had the most number of sequences annotated. Annotations  
556 to each of the other species were very similar to those from *T. bartmani*, with 80% of annotations  
557 being identical across all 5 species annotations. The remaining 20% of sequences were typically  
558 characterized by an additional term in one or more of the species. For comparisons within a  
559 lineage we used the annotation of the sexual species in that lineage. Although the annotations  
560 are very similar across all ten species the small differences in annotation could create differences  
561 in the amount of overlap observed between contrasts (e.g. if a term is annotated to an ortholog in  
562 one annotation but not another). To examine this, we repeated the analysis using only annotations  
563 from *T. bartmani*. This produced a virtually identical result (Supplemental Fig. 7C) as when using  
564 the species-pair specific annotations.

565 ***Polymorphism and divergence***

566

567 To test for differences in the rate of evolutionary divergence between gene categories, we used  
568 dN/dS ratios for each of the one-to-one orthologs from [26]. To obtain an estimate for pN/pS reads  
569 from the whole-body libraries for each asexual species were mapped to the reference using  
570 RSEM/bowtie2 with default parameters and fragment length mean = 200 fragment length sd =  
571 100 [82,83]. Samtools v1.2 was then used to create an mpileup file, which was filtered with  
572 VarScan v2.3.2 (minimum coverage = 20, minor allele frequency = 10%, and minimum average  
573 phred quality = 20) to obtain SNPs. To identify nonsynonymous and synonymous segregating  
574 polymorphisms we identified the n-fold degenerate positions following Li et al. [84] from which pN,  
575 pS and (pN/pS) could be calculated per gene. Comparison of mean pN/pS and dN/dS between  
576 convergent and non-convergent (background) genes was conducted using a permutation t-test  
577 (number of permutations = 10000) in R.

578

### 579 ***Cross-species mapping***

580

581 All of the above analyses used only the one-to-one orthologs. To examine a larger fraction of the  
582 transcriptome we produced species-pair references by using a reciprocal blast between the  
583 assemblies of sexual-asexual sister species (blastN, minimum e-val = 0.00001, minimum query  
584 coverage = 30%). Prior to this step potential contaminants were filtered from these by blasting  
585 transcripts to local versions of the nt (using blastN, default options except task blastn,  
586 max\_target\_seqs = 10) and nr (using blastX, default options except, max\_target\_seqs = 10)  
587 databases (downloaded: 07/08/2016) using NCBI's blast client (v. 2.2.30+). Blast hits with an e-  
588 value > 0.0000001 were discarded. The remaining blast hits were used to assign a phylum to  
589 sequences if >=50% of Blast hits came from one phylum (in the event of a tie, the taxa with the  
590 highest e-value was used as a tiebreaker). Transcripts that were assigned to a non-arthropoda  
591 phylum were discarded (note that transcripts with no Blast hits or that blasted to mixed phyla were  
592 retained). This filtering removed between 4-8% of transcripts (see Supplemental Table 8). Reads  
593 of each species were then mapped to each species-pair reference in the same way as for the 1-  
594 to-1 orthologs. Differential expression analyses and GO-term enrichment analyses were then  
595 repeated as described above.

596

597

## 598 **Data**

599

600 Raw reads have been deposited in the SRA. Accession codes are given in Supplementary Table  
601 16. Scripts for the analyses in this paper are available at:  
602 [https://github.com/DarrenJParker/Timema\\_convergent\\_gene\\_expression](https://github.com/DarrenJParker/Timema_convergent_gene_expression).

603

## 604 **Acknowledgments**

605

606 This study was supported by Swiss FNS grants PP00P3\_170627, PP00P3\_139013, and  
607 CRSII3\_160723. We would like to thank Chloé Larose and Bart Zijlstra for their assistance in the  
608 field.

609

## 610 **References**

- 611 1. Maynard Smith J. The origin and maintenance of sex. In: Williams GC, editor. Group  
612 Selection. Chicago: Aldine Atherton; 1971. pp. 163–175.
- 613 2. Bell G. The Masterpiece of Nature: The Evolution and Genetics of Sexuality. CUP Archive;  
614 1982.
- 615 3. Lehtonen J, Jennions MD, Kokko H. The many costs of sex. *Trends Ecol Evol*. 2012;27:  
616 172–178.
- 617 4. Avise JC. Clonality: The Genetics, Ecology and Evolution of Sexual Abstinence in  
618 Vertebrate Animals. Oxford: Oxford University Press; 2008.
- 619 5. van der Kooi CJ, Matthey-Doret C, Schwander T. Evolution and comparative ecology of  
620 parthenogenesis in haplodiploid arthropods. *Evolution Letters*. Wiley Online Library; 2017;1:  
621 304–316.
- 622 6. Lewis WM Jr. The cost of sex. In: Stearns SC, editor. The evolution of sex and its  
623 consequences. Verlag: Birkhauser; 1987. pp. 33–57.
- 624 7. West SA, Lively CM, Read AF. A pluralist approach to sex and recombination. *J Evol Biol*.  
625 Wiley Online Library; 1999;12: 1003–1012.
- 626 8. Otto SP. The evolutionary enigma of sex. *Am Nat*. journals.uchicago.edu; 2009;174 Suppl  
627 1: S1–S14.
- 628 9. Neiman M, Lively CM, Meirmans S. Why Sex? A Pluralist Approach Revisited. *Trends Ecol*  
629 *Evol*. 2017; doi:10.1016/j.tree.2017.05.004
- 630 10. Neiman M, Sharbel TF, Schwander T. Genetic causes of transitions from sexual



- 631 reproduction to asexuality in plants and animals. *J Evol Biol.* 2014;27: 1346–1359.
- 632 11. Templeton AR. The Prophecies of Parthenogenesis. In: Dingle H, Hegmann JP, editors.  
633 Evolution and Genetics of Life Histories. New York: Springer; 1982. pp. 75–101.
- 634 12. Burt A. Perspective: Sex, recombination, and the efficacy of selection—Was Weismann  
635 right? *Evolution. The Society for the Study of Evolution*; 2000;54: 337–351.
- 636 13. Schwander T, Vuilleumier S, Dubman J, Crespi BJ. Positive feedback in the transition from  
637 sexual reproduction to parthenogenesis. *Proc Biol Sci.* 2010;277: 1435–1442.
- 638 14. Jaquiéry J, Stoeckel S, Larose C, Nouhaud P, Rispe C, Mieuzet L, et al. Genetic Control of  
639 Contagious Asexuality in the Pea Aphid. *PLoS Genet. Public Library of Science*; 2014;10:  
640 e1004838.
- 641 15. Lynch M, Seyfert A, Eads B, Williams E. Localization of the genetic determinants of meiosis  
642 suppression in *Daphnia pulex*. *Genetics.* 2008;180: 317–327.
- 643 16. Eads BD, Tsuchiya D, Andrews J, Lynch M, Zolan ME. The spread of a transposon  
644 insertion in *Rec8* is associated with obligate asexuality in *Daphnia*. *Proc Natl Acad Sci U S*  
645 *A. National Acad Sciences*; 2012;109: 858–863.
- 646 17. Innes DJ, Hebert PDN. The origin and genetic basis of obligate parthenogenesis in  
647 *Daphnia pulex*. *Evolution. [Society for the Study of Evolution, Wiley]*; 1988;42: 1024–1035.
- 648 18. Schwander T, Henry L, Crespi BJ. Molecular evidence for ancient asexuality in *Timema*  
649 stick insects. *Curr Biol. Elsevier Ltd*; 2011;21: 1129–1134.
- 650 19. Schwander T, Crespi BJ. Multiple direct transitions from sexual reproduction to apomictic  
651 parthenogenesis in *Timema* stick insects. *Evolution.* 2009;63: 84–103.
- 652 20. Schwander T, Crespi BJ, Gries R, Gries G. Neutral and selection-driven decay of sexual  
653 traits in asexual stick insects. *Proc Biol Sci.* 2013;280: 20130823.
- 654 21. Nosil P, Crespi BJ, Gries R, Gries G. Natural selection and divergence in mate preference  
655 during speciation. *Genetica.* 2007;129: 309–327.
- 656 22. Arbuthnott D, Crespi BJ. Courtship and mate discrimination within and between species of  
657 *Timema* walking-sticks. *Anim Behav. Elsevier Ltd*; 2009;78: 53–59.
- 658 23. Schwander T, Arbuthnott D, Gries R, Gries G, Nosil P, Crespi BJ. Hydrocarbon divergence  
659 and reproductive isolation in *Timema* stick insects. *BMC Evol Biol. BMC Evolutionary*  
660 *Biology*; 2013;13: 151.
- 661 24. Liang C, Musser JM, Cloutier A, Prum RO, Wagner GP. Pervasive correlated evolution in  
662 gene expression shapes cell and tissue type transcriptomes. *Genome Biol Evol.*  
663 *academic.oup.com*; 2018; doi:10.1093/gbe/evy016
- 664 25. Blekhman R, Oshlack A, Chabot AE, Smyth GK, Gilad Y. Gene regulation in primates

- 665 evolves under tissue-specific selection pressures. PLoS Genet. 2008;4: e1000271.
- 666 26. Bast J, Parker DJ, Dumas Z, Jalvingh KM, Tran Van P, Jaron KS, et al. Consequences of  
667 asexuality in natural populations: insights from stick insects. Mol Biol Evol. 2018;  
668 doi:10.1093/molbev/msy058
- 669 27. Robinson MD, McCarthy DJ, Smyth GK. edgeR: a Bioconductor package for differential  
670 expression analysis of digital gene expression data. Bioinformatics. 2010;26: 139–140.
- 671 28. Johnson BR, Atallah J, Plachetzki DC. The importance of tissue specificity for RNA-seq:  
672 highlighting the errors of composite structure extractions. BMC Genomics. 2013;14: 586.
- 673 29. Supek F, Bošnjak M, Škunca N, Šmuc T. REVIGO summarizes and visualizes long lists of  
674 gene ontology terms. PLoS One. 2011;6: e21800.
- 675 30. Knell RJ, Webberley KM. Sexually transmitted diseases of insects: distribution, evolution,  
676 ecology and host behaviour. Biol Rev Camb Philos Soc. 2004;79: 557–581.
- 677 31. Szafer-Glusman E, Giansanti MG, Nishihama R, Bolival B, Pringle J, Gatti M, et al. A role  
678 for very-long-chain fatty acids in furrow ingression during cytokinesis in *Drosophila*  
679 spermatocytes. Curr Biol. 2008;18: 1426–1431.
- 680 32. Blachon S, Cai X, Roberts KA, Yang K, Polyanovsky A, Church A, et al. A proximal  
681 centriole-like structure is present in *Drosophila* spermatids and can serve as a model to  
682 study centriole duplication. Genetics. 2009;182: 133–144.
- 683 33. Bloch Qazi MC, Heifetz Y, Wolfner MF. The developments between gametogenesis and  
684 fertilization: ovulation and female sperm storage in *Drosophila melanogaster*. Dev Biol.  
685 2003;256: 195–211.
- 686 34. Heifetz Y, Wolfner MF. Mating, seminal fluid components, and sperm cause changes in  
687 vesicle release in the *Drosophila* female reproductive tract. Proc Natl Acad Sci U S A.  
688 2004;101: 6261–6266.
- 689 35. Sakai T, Kasuya J, Kitamoto T, Aigaki T. The *Drosophila* TRPA channel, Painless,  
690 regulates sexual receptivity in virgin females. Genes Brain Behav. 2009;8: 546–557.
- 691 36. Heifetz Y, Lindner M, Garini Y, Wolfner MF. Mating regulates neuromodulator ensembles at  
692 nerve termini innervating the *Drosophila* reproductive tract. Curr Biol. 2014;24: 731–737.
- 693 37. Jin LH, Shim J, Yoon JS, Kim B, Kim J, Kim-Ha J, et al. Identification and functional  
694 analysis of antifungal immune response genes in *Drosophila*. PLoS Pathog. 2008;4:  
695 e1000168.
- 696 38. Tang H, Kambris Z, Lemaitre B, Hashimoto C. Two proteases defining a melanization  
697 cascade in the immune system of *Drosophila*. J Biol Chem. 2006;281: 28097–28104.
- 698 39. Mehren JE, Griffith LC. Cholinergic neurons mediate CaMKII-dependent enhancement of



- 699 courtship suppression. *Learn Mem.* 2006;13: 686–689.
- 700 40. Edwards AC, Zwarts L, Yamamoto A, Callaerts P, Mackay TFC. Mutations in many genes  
701 affect aggressive behavior in *Drosophila melanogaster*. *BMC Biol.* 2009;7: 29.
- 702 41. Sopko R, Foos M, Vinayagam A, Zhai B, Binari R, Hu Y, et al. Combining genetic  
703 perturbations and proteomics to examine kinase-phosphatase networks in *Drosophila*  
704 embryos. *Dev Cell.* 2014;31: 114–127.
- 705 42. Losos JB. Convergence, adaptation, and constraint. *Evolution.* Wiley Online Library;  
706 2011;65: 1827–1840.
- 707 43. Natarajan C, Hoffmann FG, Weber RE, Fago A, Witt CC, Storz JF. Predictable  
708 convergence in hemoglobin function has unpredictable molecular underpinnings. *Science.*  
709 2016;354: 336–339.
- 710 44. Engelstädter J. Constraints on the evolution of asexual reproduction. *Bioessays.* 2008;30:  
711 1138–1150.
- 712 45. Eberhart CG, Wasserman SA. The *pelota* locus encodes a protein required for meiotic cell  
713 division: an analysis of G2/M arrest in *Drosophila* spermatogenesis. *Development.*  
714 1995;121: 3477–3486.
- 715 46. Hanson SJ, Schurko AM, Hecox-Lea B, Welch DBM, Stelzer C-P, Logsdon JM Jr. Inventory  
716 and phylogenetic analysis of meiotic genes in monogonont rotifers. *J Hered.* 2013;104:  
717 357–370.
- 718 47. Srinivasan DG, Fenton B, Jaubert-Possamai S, Jaouannet M. Analysis of meiosis and cell  
719 cycle genes of the facultatively asexual pea aphid, *Acyrtosiphon pisum* (Hemiptera:  
720 Aphididae). *Insect Mol Biol.* 2010;19 Suppl 2: 229–239.
- 721 48. Raborn RT, Spitze K, Brendel VP, Lynch M. Promoter Architecture and Sex-Specific Gene  
722 Expression in *Daphnia pulex*. *Genetics.* 2016;204: 593–612.
- 723 49. Warren WC, García-Pérez R, Xu S, Lampert KP, Chalopin D, Stöck M, et al. Clonal  
724 polymorphism and high heterozygosity in the celibate genome of the Amazon molly. *Nat*  
725 *Ecol Evol.* 2018; doi:10.1038/s41559-018-0473-y
- 726 50. Schatten G. The centrosome and its mode of inheritance: the reduction of the centrosome  
727 during gametogenesis and its restoration during fertilization. *Dev Biol.* 1994;165: 299–335.
- 728 51. Manandhar G, Schatten H, Sutovsky P. Centrosome reduction during gametogenesis and  
729 its significance. *Biol Reprod.* 2005;72: 2–13.
- 730 52. Marescalchi O, Zauli C, Scali V. Centrosome dynamics and inheritance in related sexual  
731 and parthenogenetic *Bacillus* (Insecta Phasmatodea). *Mol Reprod Dev.* 2002;63: 89–95.
- 732 53. Nishiyama T, Tachibana K, Kishimoto T. Cytostatic arrest: post-ovulation arrest until

- 733 fertilization in metazoan oocytes. *Oogenesis: The Universal Process*. John Wiley & Sons,  
734 Ltd; 2010; 357–387.
- 735 54. Stricker SA. Comparative biology of calcium signaling during fertilization and egg activation  
736 in animals. *Dev Biol*. 1999;211: 157–176.
- 737 55. Sartain CV, Wolfner MF. Calcium and egg activation in *Drosophila*. *Cell Calcium*. 2013;53:  
738 10–15.
- 739 56. Eberhard W. *Female Control: Sexual Selection by Cryptic Female Choice*. Princeton  
740 University Press; 1996.
- 741 57. Gillott C. Male accessory gland secretions: modulators of female reproductive physiology  
742 and behavior. *Annu Rev Entomol*. 2003;48: 163–184.
- 743 58. Yapici N, Kim Y-J, Ribeiro C, Dickson BJ. A receptor that mediates the post-mating switch  
744 in *Drosophila* reproductive behaviour. *Nature*. 2008;451: 33–37.
- 745 59. van der Kooij CJ, Schwander T. On the fate of sexual traits under asexuality. *Biol Rev*  
746 *Camb Philos Soc*. 2014;89: 805–819.
- 747 60. Greenfield MD. *Signalers and Receivers*. Oxford: Oxford University Press; 2002.
- 748 61. Hunt J, Sakaluk SK. *Mate choice. The evolution of insect mating systems* Oxford Univ  
749 Press, Oxford, UK. [books.google.com](https://books.google.com); 2014; 129–158.
- 750 62. Dahanukar A, Hallem EA, Carlson JR. Insect chemoreception. *Curr Opin Neurobiol*.  
751 2005;15: 423–430.
- 752 63. Cline TW, Dorsett M, Sun S, Harrison MM, Dines J, Sefton L, et al. Evolution of the  
753 *Drosophila* feminizing switch gene *Sex-lethal*. *Genetics*. 2010;186: 1321–1336.
- 754 64. Kokko H, Ranta E, Ruxton G, Lundberg P. Sexually transmitted disease and the evolution  
755 of mating systems. *Evolution*. 2002;56: 1091–1100.
- 756 65. Martin A, Orgogozo V. The Loci of repeated evolution: a catalog of genetic hotspots of  
757 phenotypic variation. *Evolution*. 2013;67: 1235–1250.
- 758 66. Bennabi I, Terret M-E, Verlhac M-H. Meiotic spindle assembly and chromosome  
759 segregation in oocytes. *J Cell Biol*. 2016;215: 611–619.
- 760 67. Sackton TB, Grayson P, Cloutier A, Hu Z, Liu JS, Wheeler NE, et al. Convergent regulatory  
761 evolution and the origin of flightlessness in palaeognathous birds [Internet]. *bioRxiv*. 2018.  
762 p. 262584. doi:10.1101/262584
- 763 68. Gross JB, Borowsky R, Tabin CJ. A novel role for *Mc1r* in the parallel evolution of  
764 depigmentation in independent populations of the cavefish *Astyanax mexicanus*. *PLoS*  
765 *Genet*. 2009;5: e1000326.
- 766 69. Whittall JB, Voelckel C, Kliebenstein DJ, Hodges SA. Convergence, constraint and the role

- 767 of gene expression during adaptive radiation: floral anthocyanins in *Aquilegia*. *Mol Ecol.*  
768 2006;15: 4645–4657.
- 769 70. Partha R, Chauhan BK, Ferreira Z, Robinson JD, Lathrop K, Nischal KK, et al.  
770 Subterranean mammals show convergent regression in ocular genes and enhancers, along  
771 with adaptation to tunneling. *Elife.* 2017;6. doi:10.7554/eLife.25884
- 772 71. Stern DL. The genetic causes of convergent evolution. *Nat Rev Genet.* 2013;14: 751–764.
- 773 72. Löytynoja A, Goldman N. An algorithm for progressive multiple alignment of sequences with  
774 insertions. *Proc Natl Acad Sci U S A.* 2005;102: 10557–10562.
- 775 73. Parker DJ. fasta\_tools v1.2. Zenodo <https://zenodo.org/record/59775>. 2016;  
776 doi:10.5281/zenodo.162913
- 777 74. Martin M. Cutadapt removes adapter sequences from high-throughput sequencing reads.  
778 *EMBnet.journal.* 2011;17: 10–12.
- 779 75. Bolger AM, Lohse M, Usadel B. Trimmomatic: a flexible trimmer for Illumina sequence data.  
780 *Bioinformatics.* 2014;30: 2114–2120.
- 781 76. Bray NL, Pimentel H, Melsted P, Pachter L. Near-optimal probabilistic RNA-seq  
782 quantification. *Nat Biotechnol.* 2016;34: 525–527.
- 783 77. R Core Team. R: A Language and Environment for Statistical Computing [Internet]. Vienna,  
784 Austria: R Foundation for Statistical Computing; 2017. Available: <https://www.R-project.org/>
- 785 78. Benjamini Y, Hochberg Y. Controlling the false discovery rate: A practical and powerful  
786 approach to multiple testing. *J R Stat Soc Series B Stat Methodol.* [Royal Statistical  
787 Society, Wiley]; 1995;57: 289–300.
- 788 79. Wang M, Zhao Y, Zhang B. Efficient test and visualization of multi-set intersections. *Sci*  
789 *Rep. The Author(s);* 2015;5: 16923.
- 790 80. Götz S, García-Gómez JM, Terol J, Williams TD, Nagaraj SH, Nueda MJ, et al. High-  
791 throughput functional annotation and data mining with the Blast2GO suite. *Nucleic Acids*  
792 *Res.* 2008;36: 3420–3435.
- 793 81. Alexa A, Rahnenfuhrer J. topGO: Enrichment Analysis for Gene Ontology. 2016.
- 794 82. Langmead B, Salzberg SL. Fast gapped-read alignment with Bowtie 2. *Nat Methods.*  
795 2012;9: 357–359.
- 796 83. Li B, Dewey CN. RSEM: accurate transcript quantification from RNA-Seq data with or  
797 without a reference genome. *BMC Bioinformatics.* 2011;12: 323.
- 798 84. Li WH, Wu CI, Luo CC. A new method for estimating synonymous and nonsynonymous  
799 rates of nucleotide substitution considering the relative likelihood of nucleotide and codon  
800 changes. *Mol Biol Evol.* 1985;2: 150–174.

801 85. Riesch R, Muschick M, Lindtke D, Villoutreix R, Comeault AA, Farkas TE, et al. Transitions  
802 between phases of genomic differentiation during stick-insect speciation. *Nature Ecology &*  
803 *Evolution*. Nature Publishing Group; 2017;1: 0082.

804

805

806

807 **Table 1** | Overlap of differentially expressed genes between different tissue types. Number of  
 808 genes expected by chance given in parentheses. P-values are from a fisher's exact test corrected  
 809 for multiple tests. Species names are abbreviated as follows: Tbi = *T. bartmani*, Tce = *T. cristinae*,  
 810 Tps = *T. poppensis*, Tcm = *T. californicum*, Tpa = *T. podura*, Tte = *T. tahoe*, Tms = *T. monikensis*,  
 811 Tdi = *T. douglasi*, Tsi = *T. shepardii*, and Tge = *T. genevievae*.

|                               | <b>Reproductive tract &amp; legs</b>   | <b>Whole-body &amp; legs</b>          | <b>Whole-body &amp; reproductive tract</b> |
|-------------------------------|----------------------------------------|---------------------------------------|--------------------------------------------|
| <b>Convergent genes</b>       | 22 (16)<br>$p = 0.14$                  | 7 (5)<br>$p = 0.21$                   | 4 (4)<br>$p = 0.65$                        |
| <b>Species-pair (Tbi-Tte)</b> | 62 (24)<br>$p = 1.30 \times 10^{-14}$  | 68 (29)<br>$p = 4.57 \times 10^{-14}$ | 25 (7)<br>$p = 4.53 \times 10^{-9}$        |
| <b>Species-pair (Tce-Tms)</b> | 88 (47)<br>$p = 1.36 \times 10^{-10}$  | 48 (9)<br>$p = 6.19 \times 10^{-25}$  | 47 (14)<br>$p = 3.86 \times 10^{-16}$      |
| <b>Species-pair (Tcm-Tsi)</b> | 42 (11)<br>$p = 4.45 \times 10^{-15}$  | 24 (5)<br>$p = 4.64 \times 10^{-11}$  | 19 (3)<br>$p = 4.64 \times 10^{-11}$       |
| <b>Species-pair (Tpa-Tge)</b> | 153 (134)<br>$p = 1.99 \times 10^{-2}$ | 102 (60)<br>$p = 1.22 \times 10^{-9}$ | 86 (54)<br>$p = 8.75 \times 10^{-07}$      |
| <b>Species-pair (Tps-Tdi)</b> | 56 (20)<br>$p = 1.31 \times 10^{-15}$  | 59 (37)<br>$p = 6.08 \times 10^{-5}$  | 32 (7)<br>$p = 7.81 \times 10^{-14}$       |

812

813

814

815

816

817 **Figures**

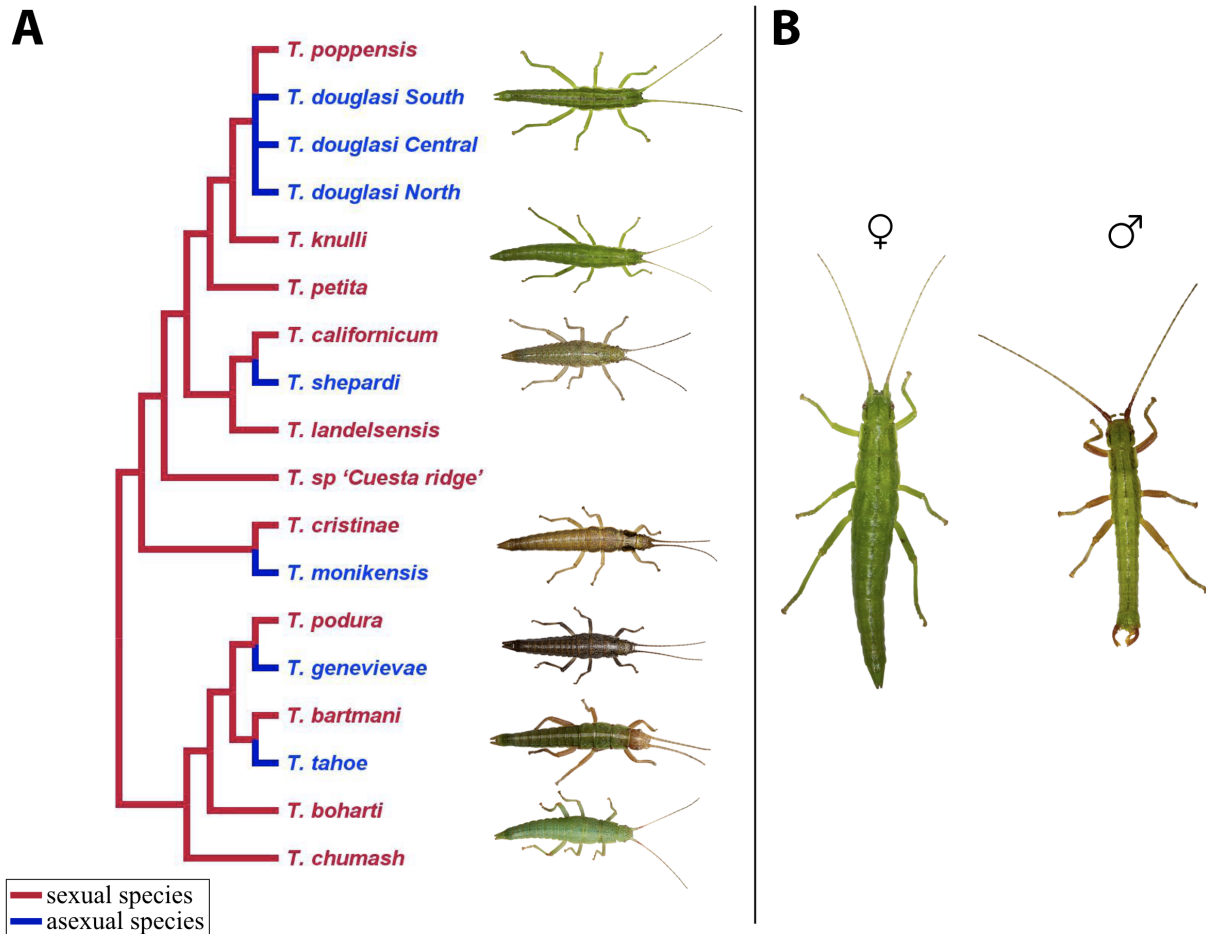

818

819

820 **Figure 1 | A.** Phylogeny of described *Timema* species (redrawn from [85] with asexual species

821 added from [18]). Sexually reproducing species are shown in red, independently derived asexual

822 lineages in blue. Our study used the five asexual species (for *T. douglasi* only the southern lineage

823 was used) and their sexual sister species. **B.** Sexual dimorphism in *Timema* (*T. knulli*).

824

825

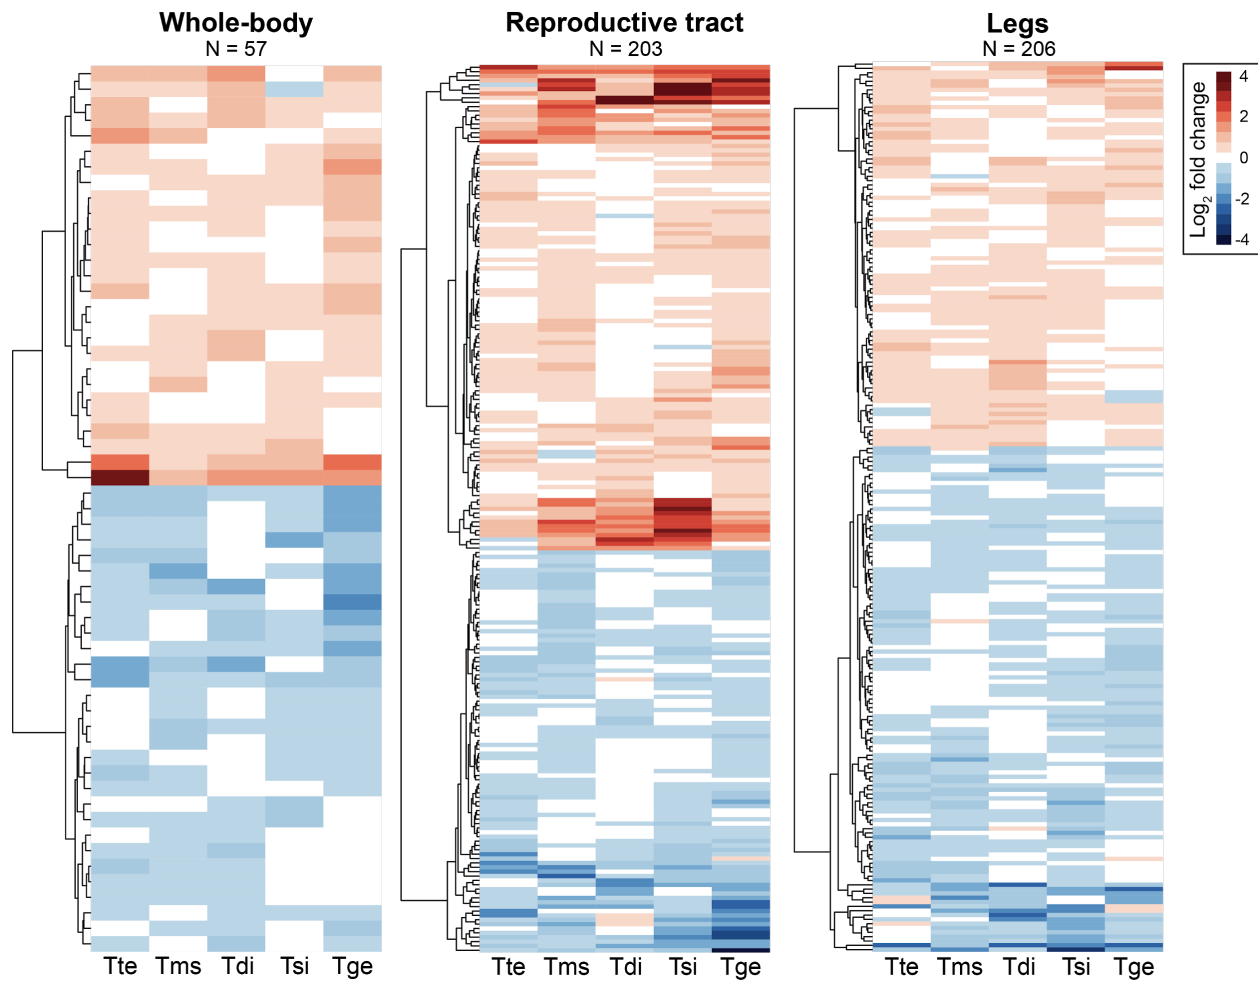

826

827

828 **Figure 2** | Heatmaps of genes showing convergent gene expression changes between sexual

829 and asexual females for whole-bodies, reproductive tract, and legs. Species names are

830 abbreviated as follows: Tte = *T. tahoe*, Tms = *T. monikensis*, Tdi = *T. douglasi*, Tsi = *T.*

831 *shepardii*, and Tge = *T. genevieveae*.

832

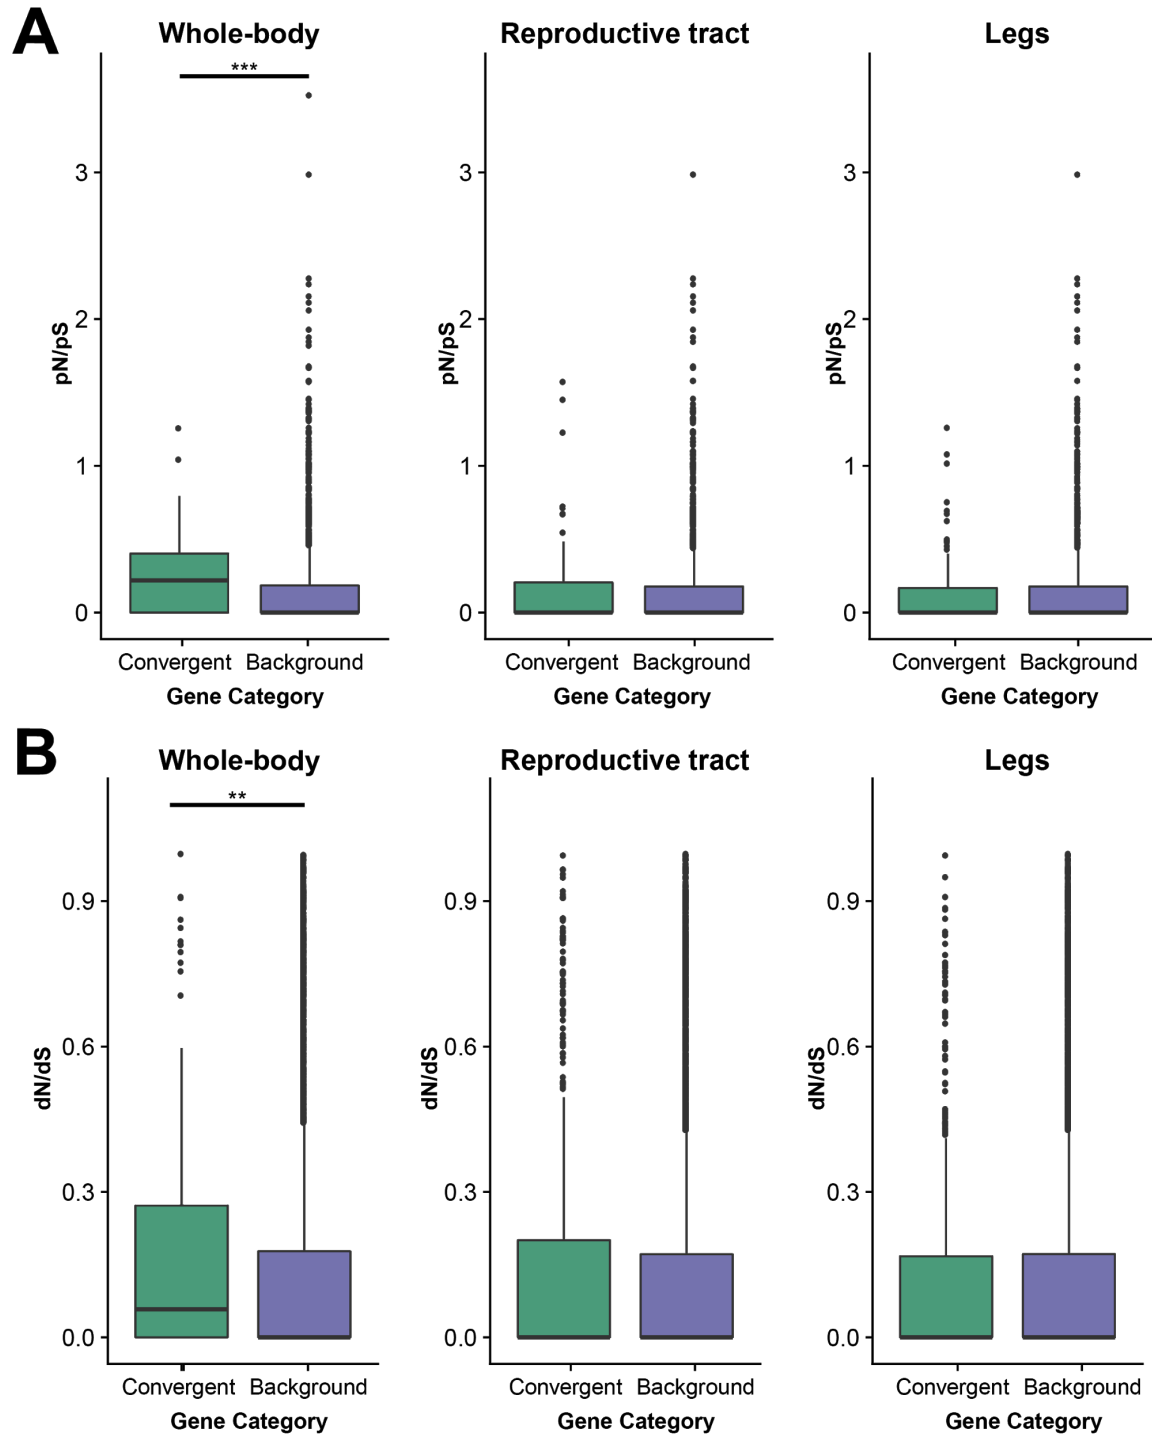

833  
834  
835  
836  
837  
838  
839

**Figure 3** | pN/pS ratios (A) and dN/dS ratios (B) for convergently expressed genes versus all other genes expressed in that tissue for whole-bodies, reproductive tracts and legs. Significance is indicated by asterisks (\*\* < 0.01, \*\*\* < 0.001).



840  
841

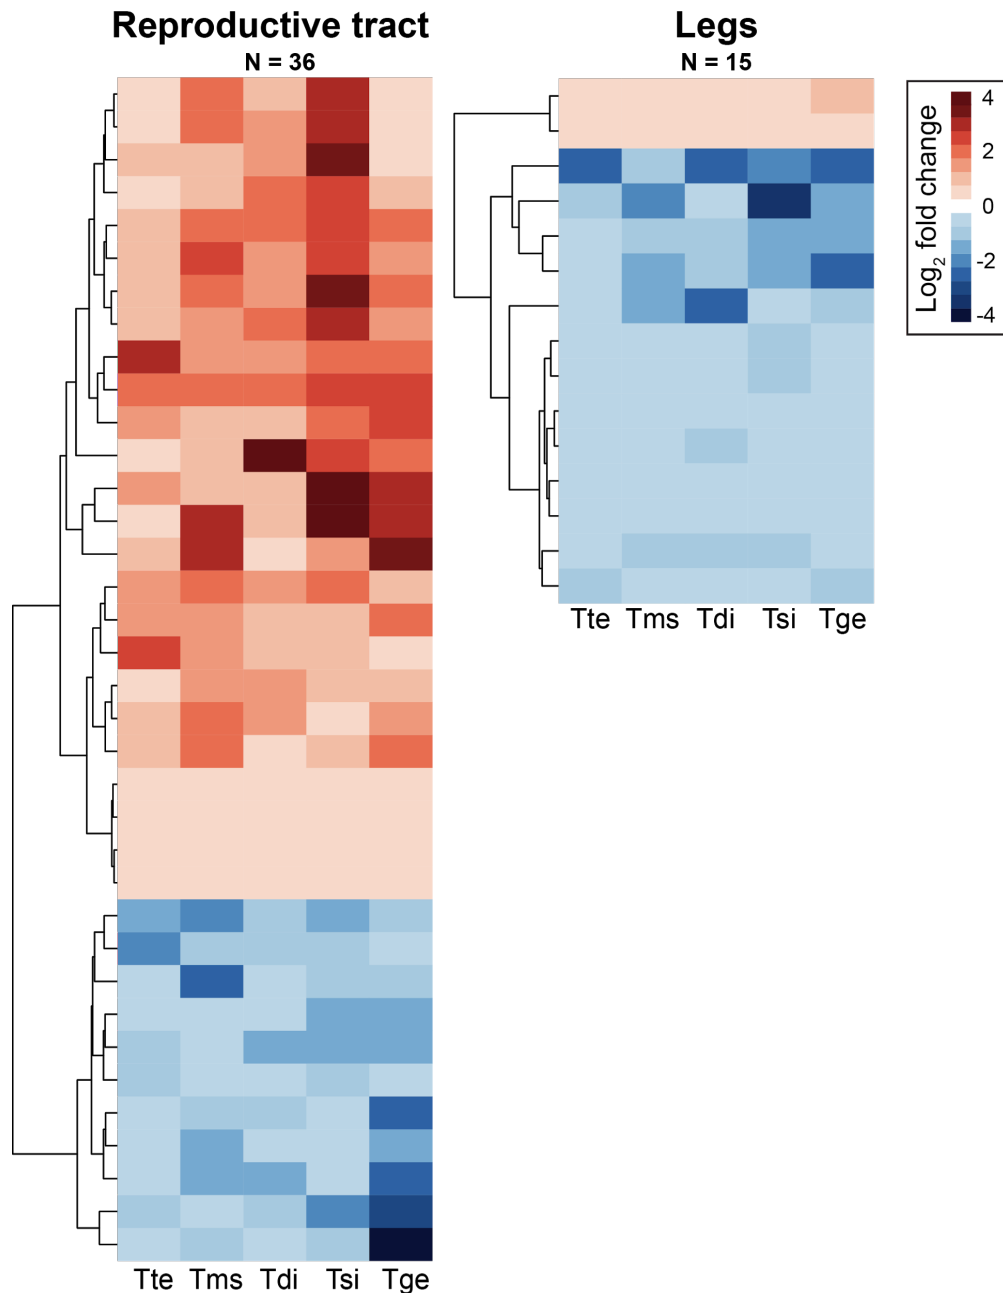

842  
843  
844  
845  
846  
847  
848

**Figure 4** | Heatmaps of candidate convergent gene expression changes between sexual and asexual females for the reproductive tract and legs. Species names are abbreviated as follows: Tte = *T. tahoe*, Tms = *T. monikensis*, Tdi = *T. douglasi*, Tsi = *T. shepardii*, and Tge = *T. genevievae*.

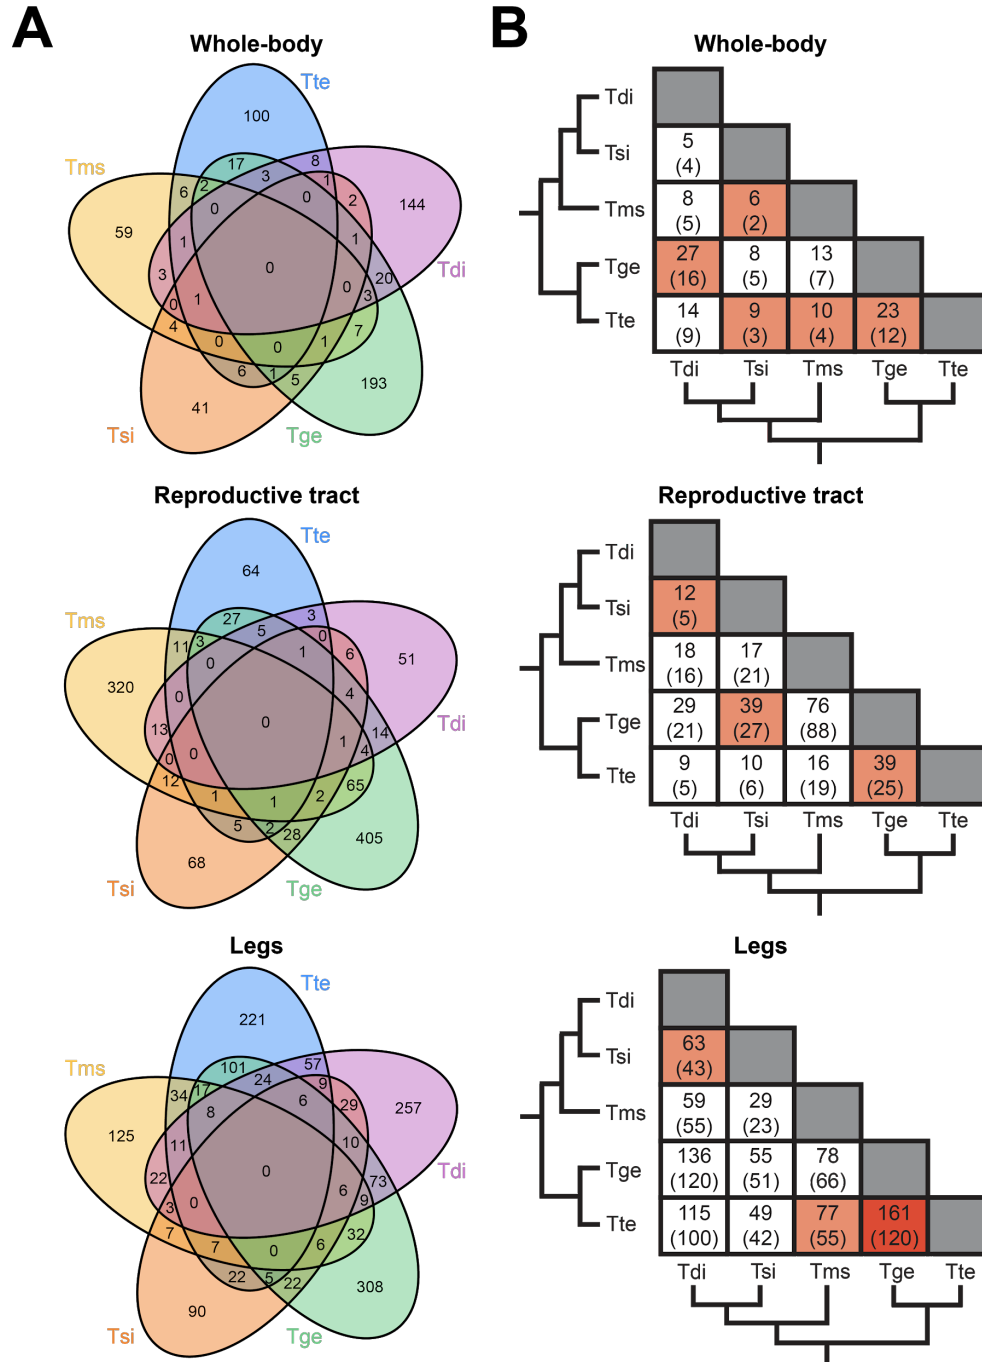

849  
850

851 **Figure 5** | A. Venn-diagrams showing the number differentially expressed (DE) genes between  
852 sexual and asexual females that are shared among species-pairs for whole-body, reproductive  
853 tract, and legs for 10 species orthologs (FDR < 0.05). B. Matrices showing pairwise overlap of DE  
854 genes between sex-asex species with the number of genes expected by chance given in  
855 parentheses. Colours represent a significantly greater overlap than expected by chance (red, FDR  
856 < 0.001, orange < 0.05). The phylogeny shows the relationships between asexual species (from  
857 [18]). Species-pair names are abbreviated as follows: Tte = *T. tahoe*, Tms = *T. monikensis*, Tdi =  
858 *T. douglasi*, Tsi = *T. shepardi*, and Tge = *T. genevievae*.

859

860 **Supplementary Figures**

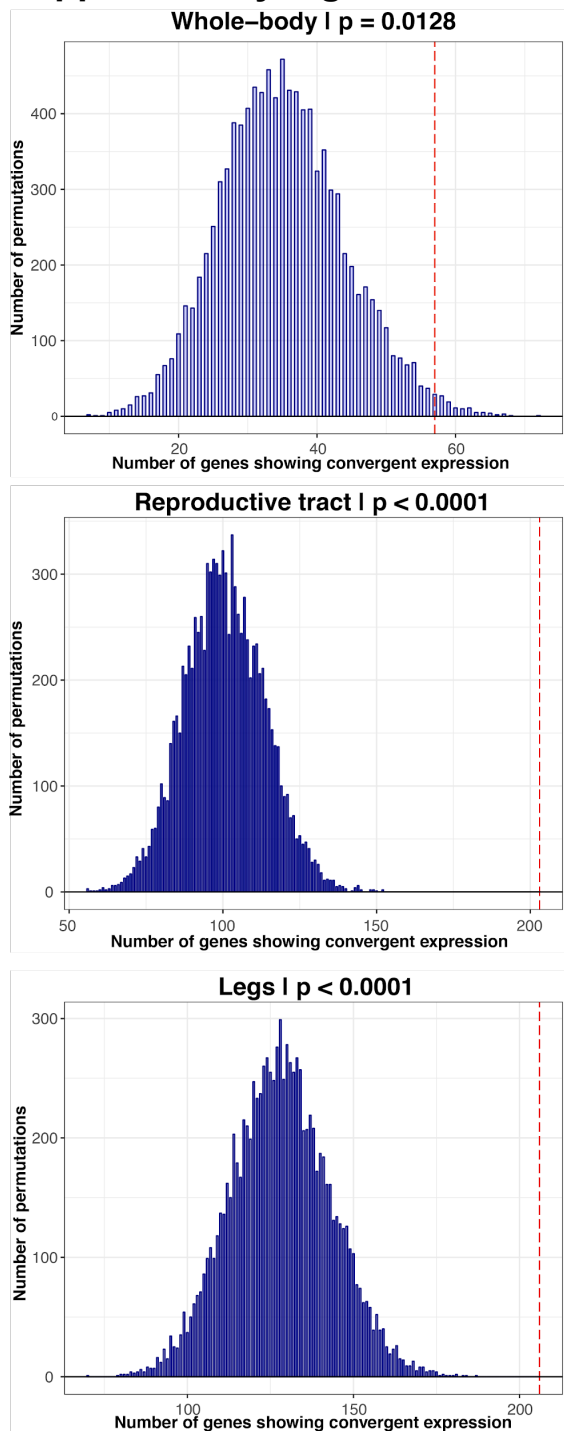

861

862

863 **Supplementary Figure 1** | Number of genes expected to show a convergent expression pattern  
864 by chance (assessed by assigning reproductive mode randomly within species pairs for each  
865 gene for 10,000 permuted datasets). The observed number of convergent genes is indicated by

866 the red dashed line. P-values refer to the probability of observing a number of convergent genes  
867 greater-than or equal-to the observed value.

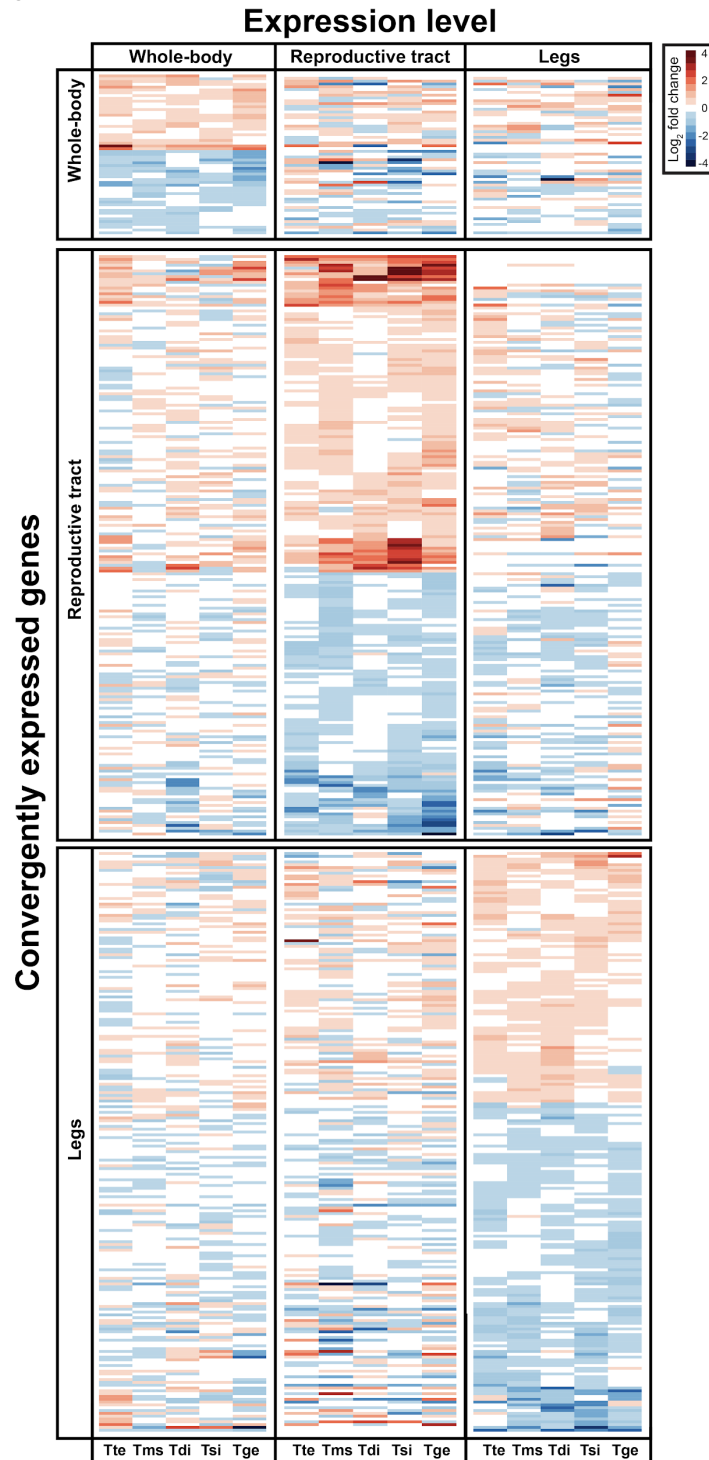

868  
869

870 **Supplementary Figure 2** | Convergently changing genes are largely tissue-specific. Heatmaps  
871 of genes showing convergent gene expression changes between sexual and asexual females  
872 for whole-bodies, reproductive tract, and legs, including their expression in other tissues.

873 Species names are abbreviated as follows: Tte = *T. tahoe*, Tms = *T. monikensis*, Tdi = *T.*  
874 *douglasi*, Tsi = *T. shepardi*, and Tge = *T. genevievae*.  
875

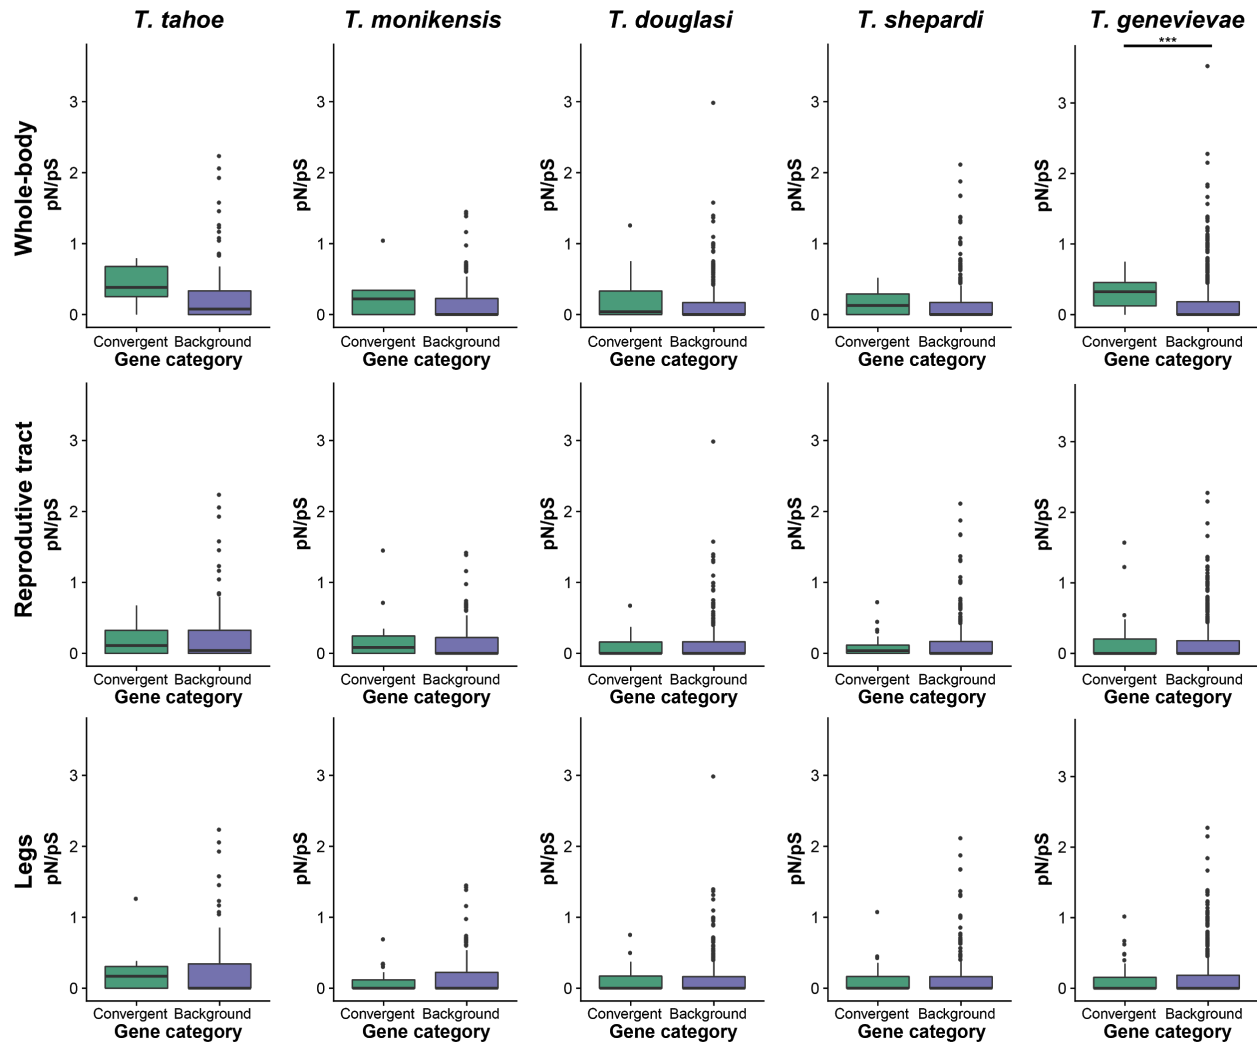

876  
877  
878  
879  
880  
881

**Supplementary Figure 3** | pN/pS ratios for convergently expressed genes versus all other genes expressed in that tissue for whole-bodies, reproductive tracts and legs for each asexual species. Significance is indicated by asterisks (\*\*\*) < 0.001) from a Wilcoxon test.

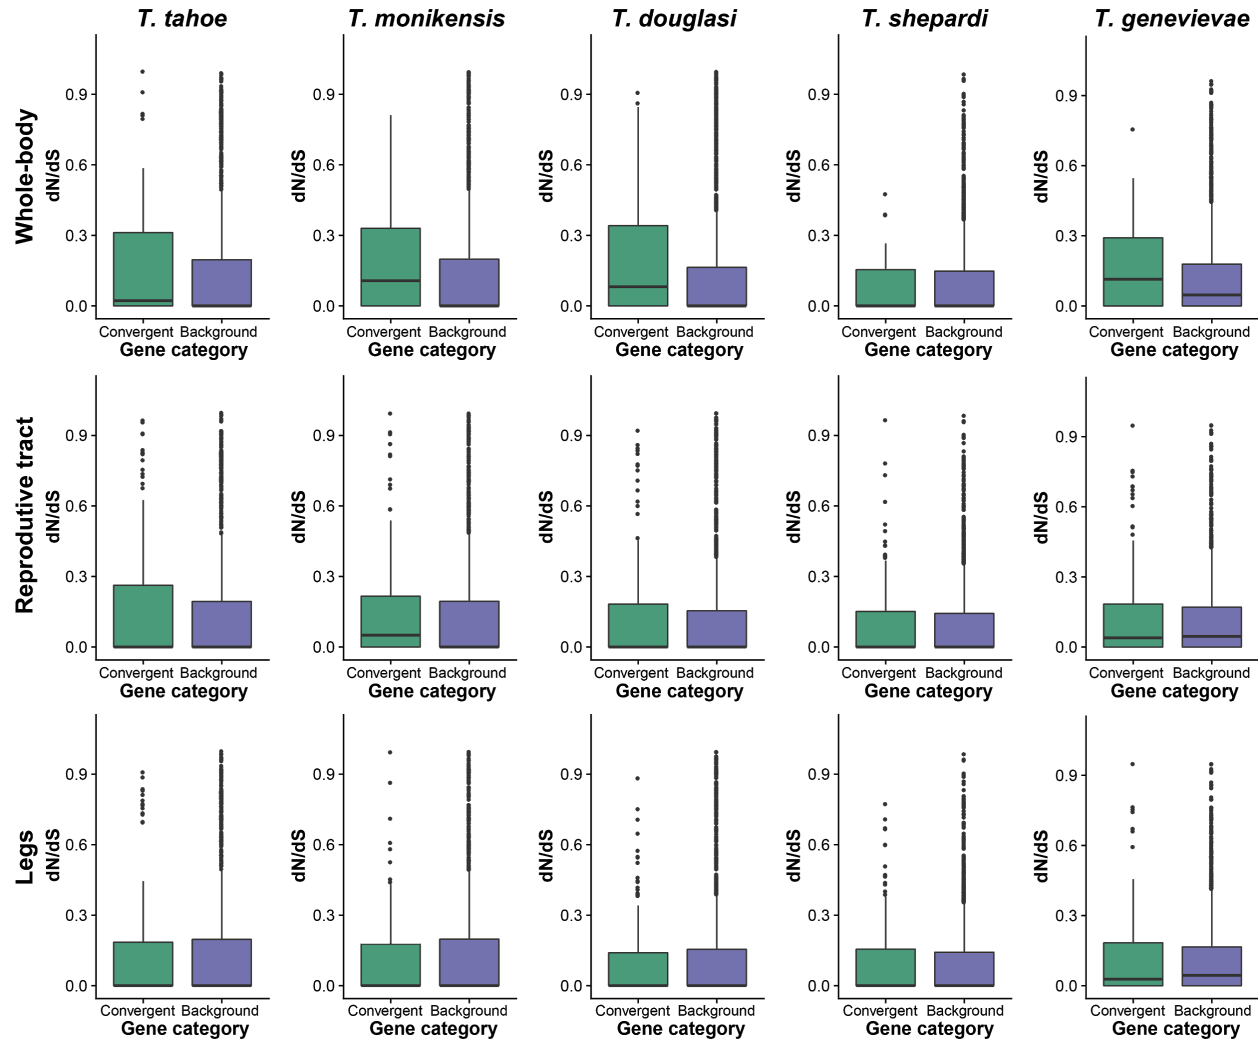

882

883

884 **Supplementary Figure 4 |** dN/dS ratios for convergently expressed genes versus all other

885 genes expressed in that tissue for whole-bodies, reproductive tract and legs for each asexual

886 species. No comparisons were significantly different (Wilcoxon test,  $p > 0.05$ ).

887

888

889

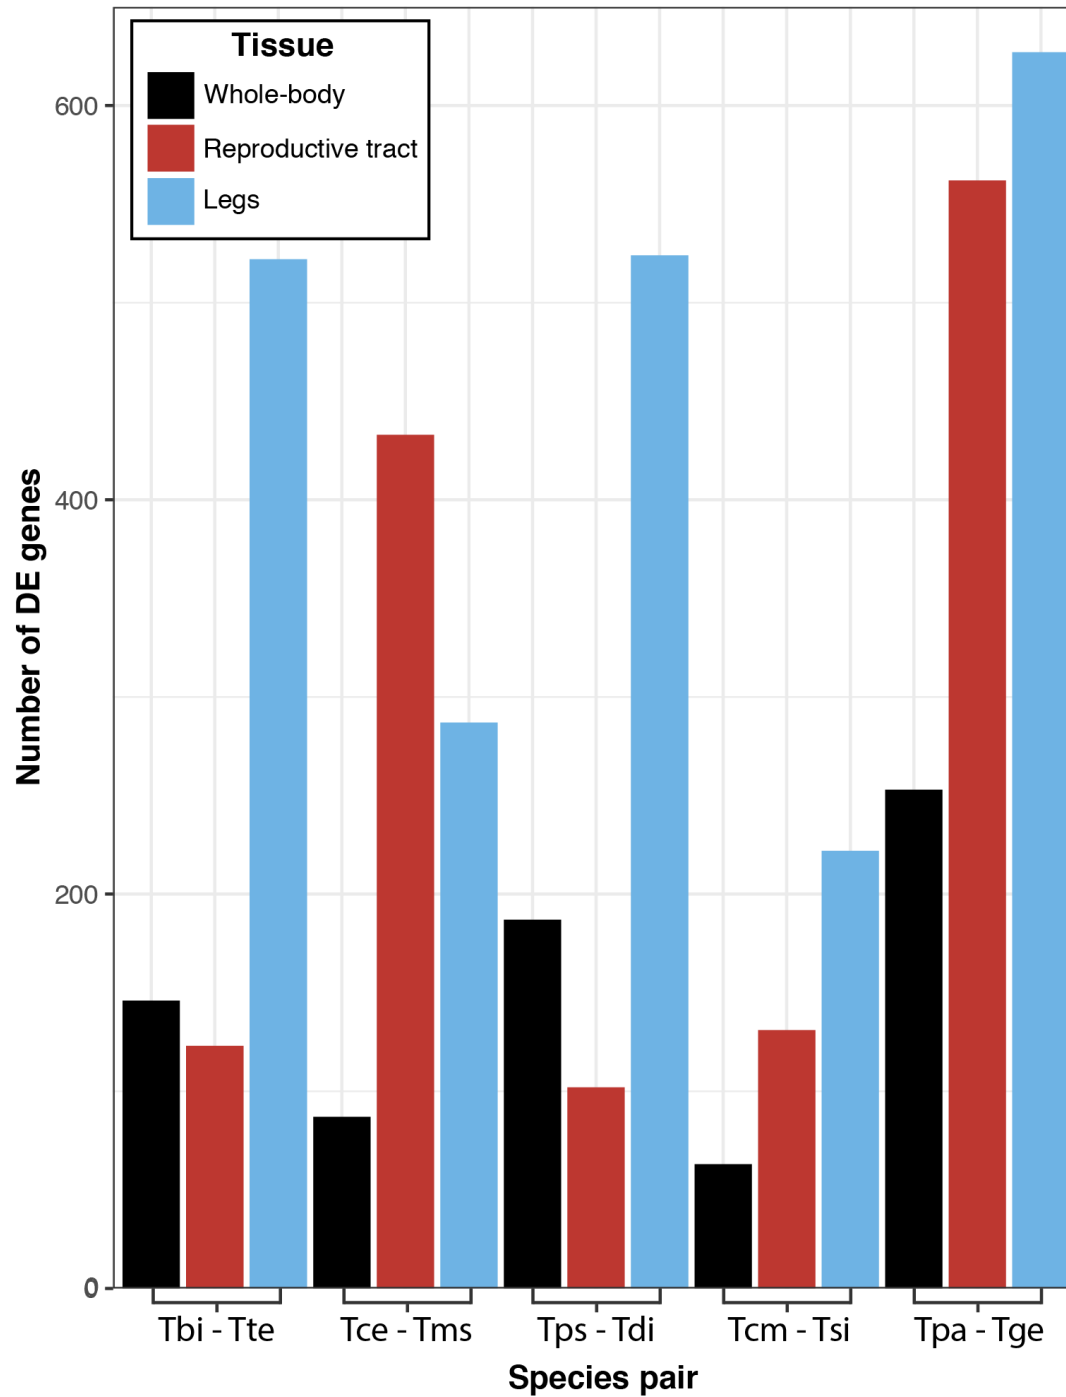

890  
891  
892  
893  
894  
895  
896  
897  
898

**Supplementary Figure 5** | Number of DE genes (FDR < 0.05) between sexual and asexual females for each species-pair for whole-body, reproductive tract, and legs for the 10 species orthologs. Species names are abbreviated as follows: Tbi = *T. bartmani*, Tce = *T. cristinae*, Tps = *T. poppensis*, Tcm = *T. californicum*, Tpa = *T. podura*, Tte = *T. tahoe*, Tms = *T. monikensis*, Tdi = *T. douglasi*, Tsi = *T. shepardj*, and Tge = *T. genevievae*.



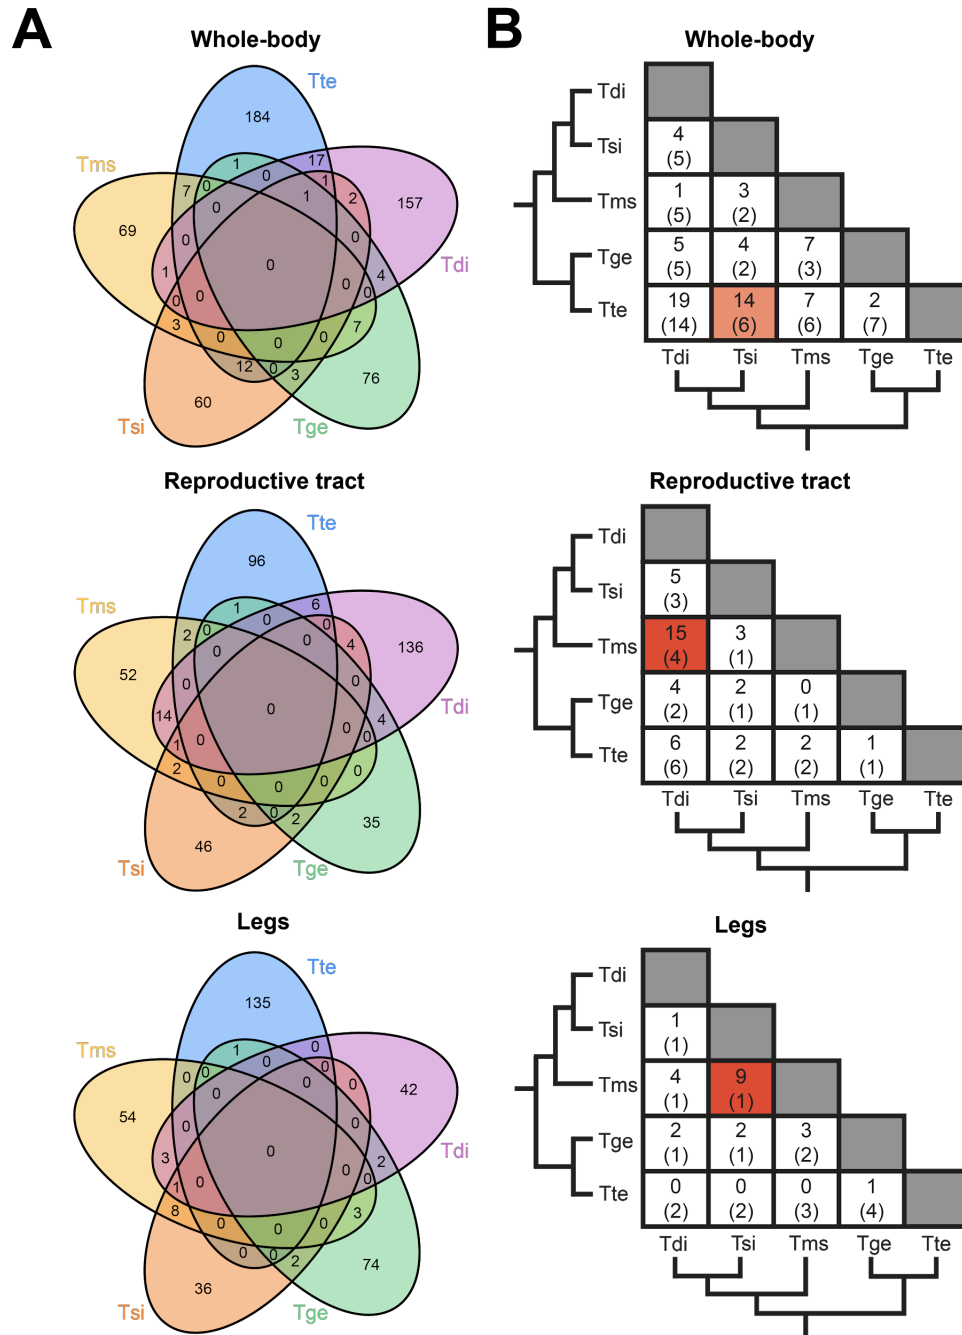

899  
900

901 **Supplementary Figure 6** | A. Venn-diagrams showing the number of enriched GO-terms  
 902 between sexual and asexual females that are shared among species-pairs for whole-body,  
 903 reproductive tracts, and legs for 10 species orthologs (FDR < 0.05). B. Matrices showing  
 904 pairwise overlap of enriched GO-terms between sexual and asexual females with the number of  
 905 GO terms expected by chance given in parentheses. Colours represent a significantly greater  
 906 overlap than expected by chance (red, FDR < 0.001, orange < 0.05). The phylogeny shows the  
 907 relationships between asexual species (from Schwander et al [18]). Species names are  
 908 abbreviated as follows: Tte = *T. tahoe*, Tms = *T. monikensis*, Tdi = *T. douglasi*, Tsi = *T.*  
 909 *shepardii*, and Tge = *T. genevievae*.

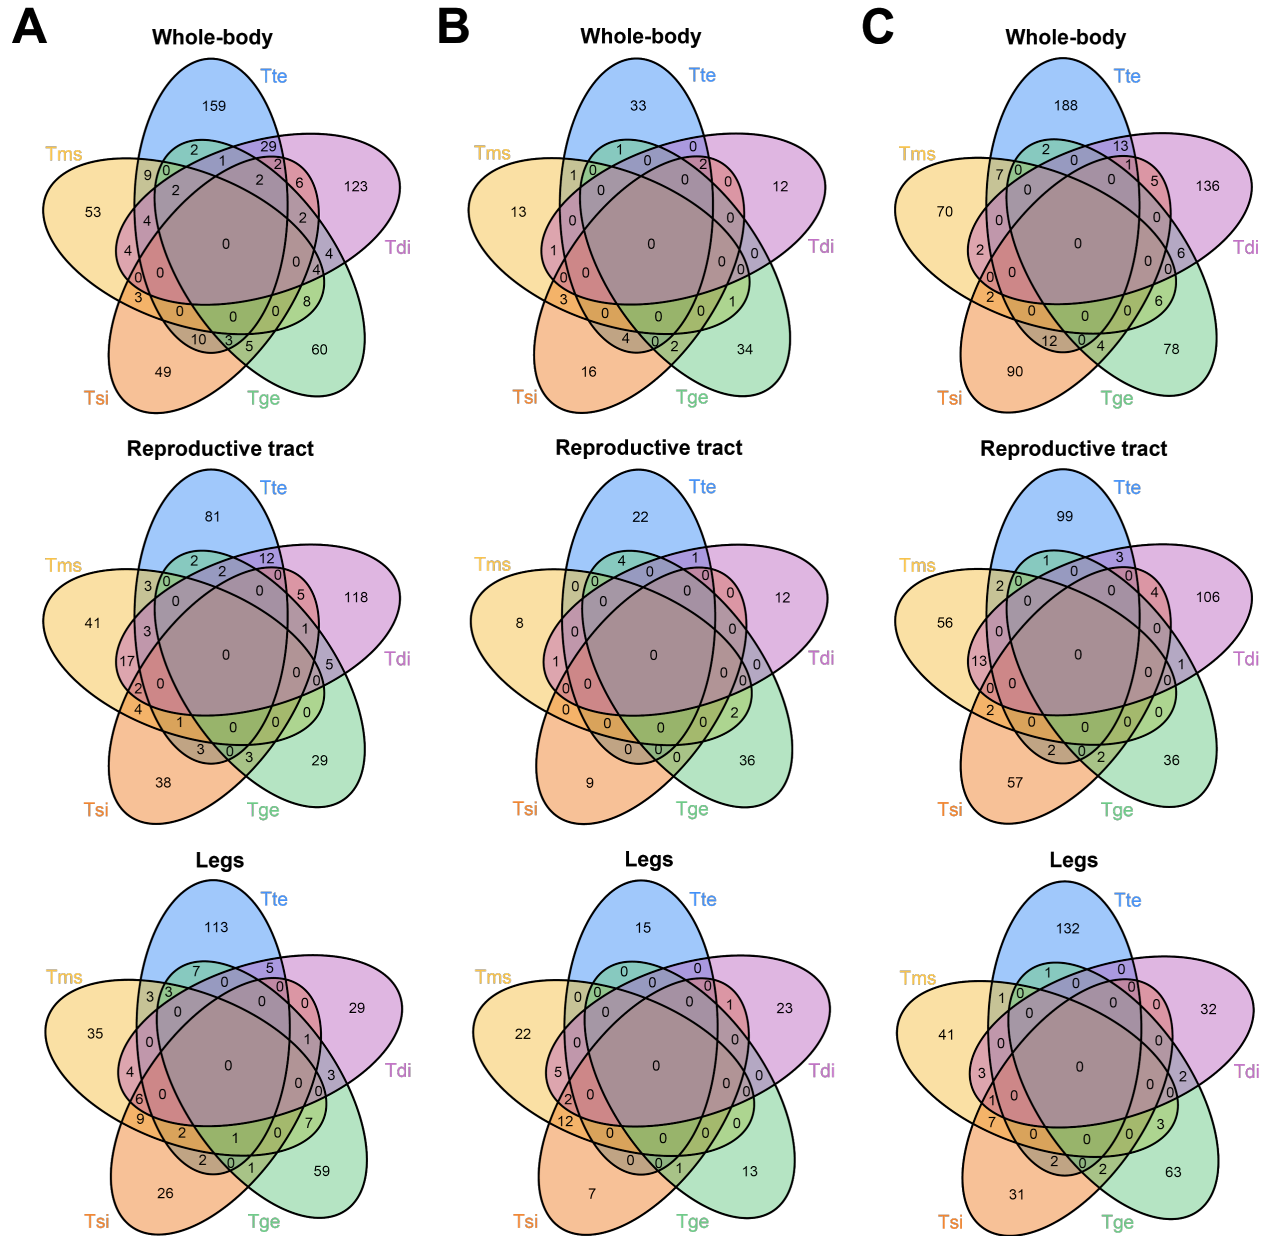

910  
911

912 **Supplementary Figure 7** | Venn-diagrams showing the number of enriched GO-terms ( $p <$   
913  $0.05$ ) for differences between sexual and asexual females that are shared among species-pairs  
914 in the whole-body, reproductive tract, and legs when: **A** GO terms were first clustered together  
915 based on parent or child terms, **B** only NCBI's nr annotation was used, **C** only the *T. bartmani*  
916 annotation. Species names are abbreviated as follows: Tte = *T. tahoe*, Tms = *T. monikensis*, Tdi  
917 = *T. douglasi*, Tsi = *T. shepardii*, and Tge = *T. genevievae*.

918  
919

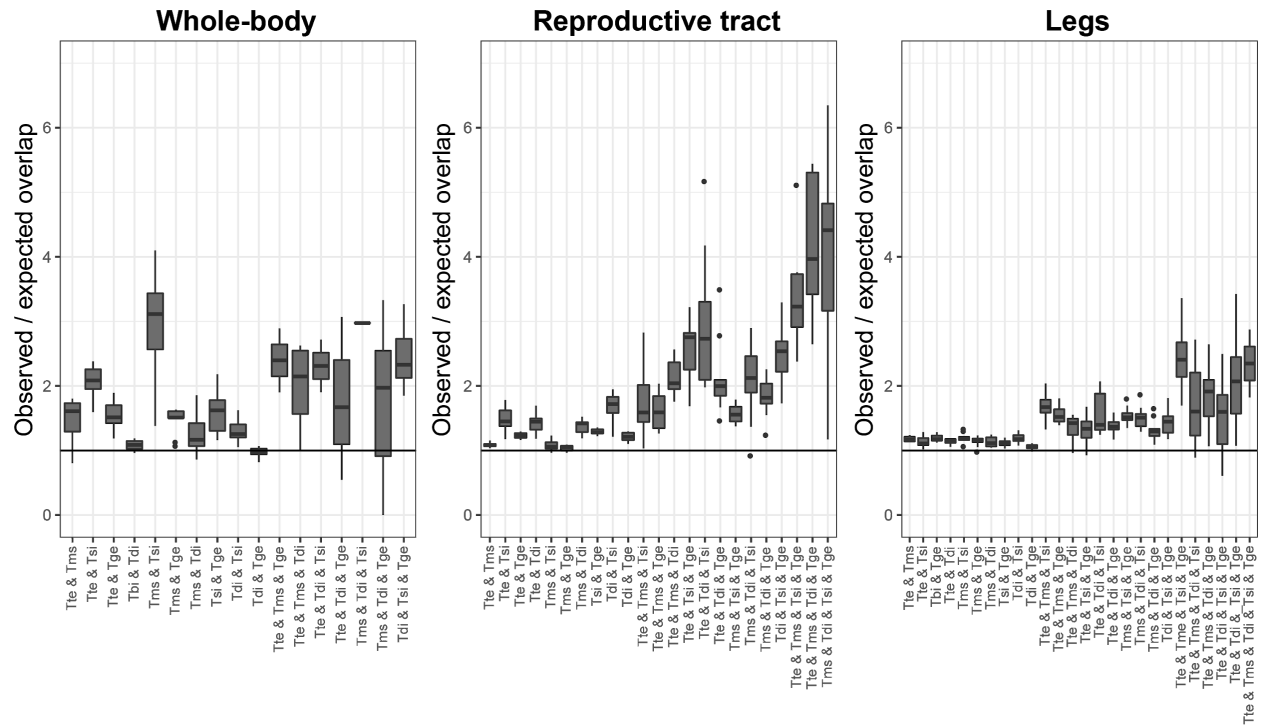

920  
921  
922  
923  
924  
925  
926  
927  
928  
929  
930  
931

**Supplementary Figure 8** | Ratio of observed to expected amount of overlap for genes when reads were mapped to the whole transcriptome for each species. Note boxes are only shown when the expected overlap was  $\geq 1$ . Species names are abbreviated as follows: Tte = *T. tahoe*, Tms = *T. monikensis*, Tdi = *T. douglasi*, Tsi = *T. shepardii*, and Tge = *T. genevieveae*.

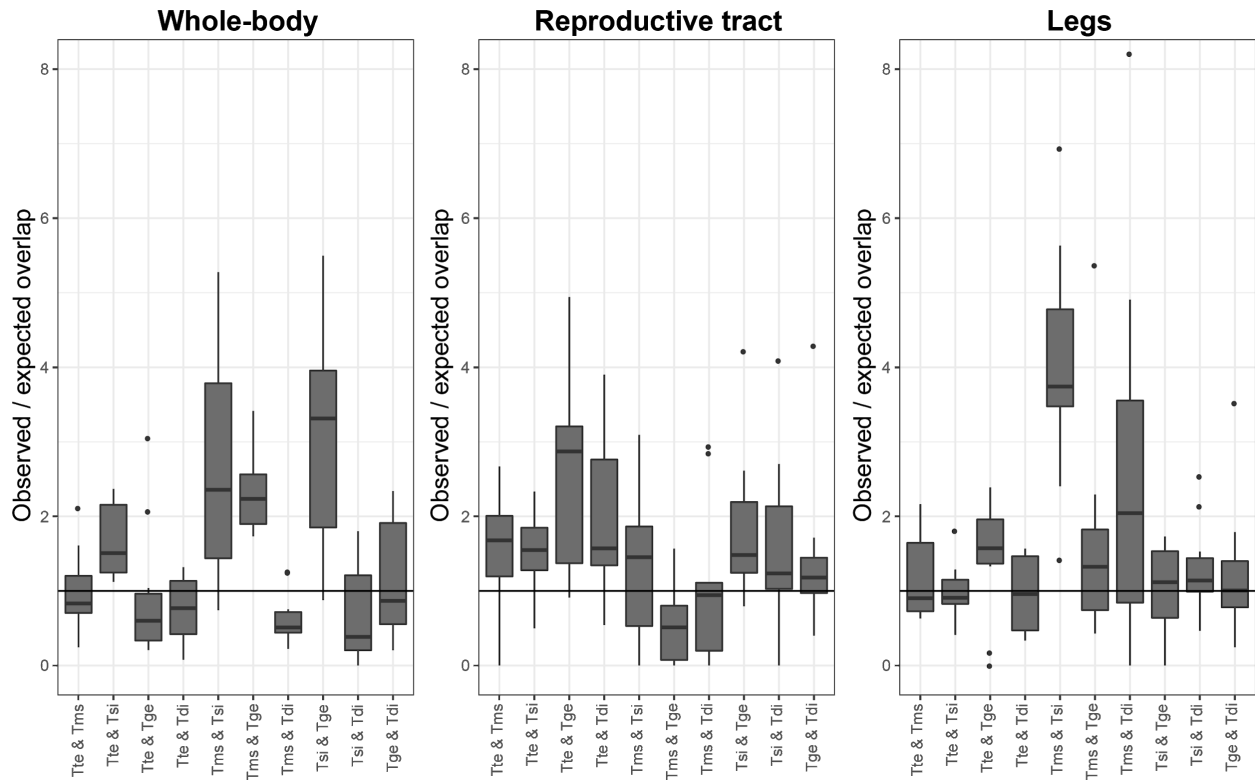

932  
933

934 **Supplementary Figure 9** | Ratio of observed to expected amount of overlap of enriched GO-  
935 terms when reads were mapped to the whole transcriptome for each species. Note boxes are  
936 only shown when the expected overlap was  $\geq 1$ . Species names are abbreviated as follows:  
937 Tte = *T. tahoe*, Tms = *T. monikensis*, Tdi = *T. douglasi*, Tsi = *T. shepardii*, and Tge = *T.*  
938 *genevieveae*.

939  
940
